# RNA-Seq Analysis of the *Sclerotinia homoeocarpa* – Creeping Bentgrass Pathosystem

Angela M. Orshinsky<sup>1\*</sup>, Jinnan Hu<sup>1,9</sup>, Stephen O. Opiyo<sup>2</sup>, Venu Reddyvari-Channarayappa<sup>3</sup>, Thomas K. Mitchell<sup>1</sup>, Michael J. Boehm<sup>1</sup>

**1** Department of Plant Pathology, The Ohio State University, Columbus, Ohio, United States of America, **2** Molecular and Cellular Imaging Center-Columbus. The Ohio State University, Columbus, Ohio, United States of America, **3** Dale Bumpers National Rice Research Center, Stuttgart, Arizona, United States of America

## Abstract

*Sclerotinia homoeocarpa* causes dollar spot disease, the predominate disease on highly-maintained turfgrass. Currently, there are major gaps in our understanding of the molecular interactions between *S. homoeocarpa* and creeping bentgrass. In this study, 454 sequencing technology was used in the *de novo* assembly of *S. homoeocarpa* and creeping bentgrass transcriptomes. Transcript sequence data obtained using Illumina's first generation sequencing-by-synthesis (SBS) were mapped to the transcriptome assemblies to estimate transcript representation in different SBS libraries. SBS libraries included a *S. homoeocarpa* culture control, a creeping bentgrass uninoculated control, and a library for creeping bentgrass inoculated with *S. homoeocarpa* and incubated for 96 h. A Fisher's exact test was performed to determine transcripts that were significantly different during creeping bentgrass infection with *S. homoeocarpa*. Fungal transcripts of interest included glycosyl hydrolases, proteases, and ABC transporters. Of particular interest were the large number of glycosyl hydrolase transcripts that target a wide range of plant cell wall compounds, corroborating the suggested wide host range and saprophytic abilities of *S. homoeocarpa*. Several of the multidrug resistance ABC transporters may be important for resistance to both fungicides and plant defense compounds. Creeping bentgrass transcripts of interest included germins, ubiquitin transcripts involved in proteasome degradation, and cinnamoyl reductase, which is involved in lignin production. This analysis provides an extensive overview of the *S. homoeocarpa*-turfgrass pathosystem and provides a starting point for the characterization of potential virulence factors and host defense responses. In particular, determination of important host defense responses may assist in the development of highly resistant creeping bentgrass varieties.

**Citation:** Orshinsky AM, Hu J, Opiyo SO, Reddyvari-Channarayappa V, Mitchell TK, et al. (2012) RNA-Seq Analysis of the *Sclerotinia homoeocarpa* – Creeping Bentgrass Pathosystem. PLoS ONE 7(8): e41150. doi:10.1371/journal.pone.0041150

**Editor:** Ying Xu, University of Georgia, United States of America

**Received:** March 8, 2012; **Accepted:** June 18, 2012; **Published:** August 8, 2012

**Copyright:** © 2012 Orshinsky et al. This is an open-access article distributed under the terms of the Creative Commons Attribution License, which permits unrestricted use, distribution, and reproduction in any medium, provided the original author and source are credited.

**Funding:** This study was supported with state and federal dollars appropriated to The Ohio State University and the Ohio Agricultural Research and Development Center. The funders had no role in study design, data collection and analysis, decision to publish, or preparation of the manuscript.

**Competing Interests:** The authors have declared that no competing interests exist.

\* E-mail: aorshinsky@gmail.com

<sup>9</sup> These authors contributed equally to this work.

## Introduction

*Sclerotinia homoeocarpa* (Bennett) is an ascomycete fungus that causes dollar spot disease on turfgrass world-wide [1]. *S. homoeocarpa* can affect all species of turfgrass as well as some dicot plants [1]. Creeping bentgrass (*Agrostis stolonifera* L.) is a cool-season turfgrass that is common on golf course greens in the United States and Canada [2]. Many commonly used creeping bentgrass cultivars are highly susceptible to dollar spot disease and are subject to frequent, low mowing practices that promote disease outbreaks [1,3].

Symptoms of dollar spot include straw-colored, hourglass-shaped lesions with characteristic reddish-brown borders. Diseased areas grow to about 2.5 cm wide [1]. Under high disease pressure and favorable conditions the diseased areas will merge to form larger patches of diseased turf. Environmental conditions favoring disease development have been well documented [4,5,6]; however, prediction models designed to reduce fungicide inputs have been ineffective due to a lack of understanding of the *S. homoeocarpa* lifestyle, epidemiology, and disease etiology [1,4].

*S. homoeocarpa* is thought to overwinter in the thatch of turf swards as stroma. In the spring, *S. homoeocarpa* becomes active and infects the newly emerging leaf tissue through wounds, stomates, and directly with appressorium formation [7,8,9]. Only infertile apothecia have been recorded for North American isolates [10]; however, population studies suggest that genetic recombination in this fungus is possible [11]. Therefore, the possibility of ascospore production and the role of sexual or asexual spores as initial inoculum for dispersal of *S. homoeocarpa* cannot be discounted. Early studies noted root browning and cell death through the production of diffusible toxins [12]. Recent studies have identified several tetranorditerpenoid compounds that could be responsible for the root-browning and exhibit extremely phytotoxic properties; however, a correlation between the production of these compounds and disease symptoms was not established [13].

Cultural management strategies for dollar spot include maintaining adequate nitrogen balance, promotion of air flow to assist in dew removal, and using moderately resistant cultivars or species of turf [14,15]. On highly maintained areas such as golf courses, cultural practices are not sufficient for management of dollar spot, and fungicides are often applied biweekly to weekly. High amounts

of fungicide use have resulted in resistance to several chemical classes commonly used on turf [1]. Other nonfungicide products that have been marketed for dollar spot control include plant defense activators that work by activating two different plant defense pathways: induced systemic resistance (ISR) and systemic acquired resistance (SAR). However, it is unclear which pathway would be most beneficial for preventing dollar spot epidemics.

A better understanding of the molecular interactions between *S. homoeocarpa* and creeping bentgrass will be essential for the development of more sustainable and practical management strategies, including the use of plant defense activators and the development of cultivars with increased resistance to *S. homoeocarpa*.

The introduction of next generation sequencing, also termed massively parallel sequencing (MPS), has enabled researchers to sequence the genomes and transcriptomes of organisms at a relatively low cost in return for a vast amount of data with quantitative properties [16,17,18,19]. In this paper, two MPS technologies were used to generate sequence data for RNA-Sequence (RNA-Seq) analysis: Illumina's sequencing-by-synthesis (SBS) and Roche's 454-pyrosequencing. The 454 reads were used for the *de novo* assembly of *S. homoeocarpa* and creeping bentgrass transcriptome libraries. SBS reads were mapped to the 454 assemblies to calculate transcript levels from *S. homoeocarpa* and creeping bentgrass during dollar spot disease development. The objective of this study was to identify transcripts that may be important for fungal virulence and creeping bentgrass defense. The results of the analysis will be used to form testable hypotheses for future studies on dollar spot etiology and turfgrass defense mechanisms.

**Results**

**Transcriptomic Analysis**

The *S. homoeocarpa* (SH) 454 sequencing data contained 600,760 reads total, and the *A. stolonifera* (AS) 454 sequence data contained 205,403 reads total (Table 1). The 454 read lengths ranged from 50 bp to >500 bp, with a majority of the reads between 400 and 500 bp in length. The transcriptome coverage for each of the 454 assemblies was 3.3× coverage for AS and 17.2× coverage for the SH assembly. These sequencing coverages were calculated by dividing the total number of sequence reads by the size of the respective, assembled transcriptome libraries.

The SBS data, which was used for calculating significant differences in transcript levels between libraries, resulted in 4.3–7.2 million reads (Table 2); however, these reads were only 16 bp long. This is due to the use of first generation Illumina sequencing protocols. The SBS reads provided ample coverage of the entire transcript assemblies: 14× coverage for SH and 12× for AS. The SBS library construction resulted in 9, 319 SH transcripts with lengths ranging from 400 bp to 3, 500 bp and a distribution peak

at 500 bp. Construction of the SBS transcript library for AS resulted in 20, 293 transcript sequences with lengths ranging from 200 bp to 8,500 bp and distribution peak at 480 bp. The full length of transcripts was not estimated since very few annotated coding sequences from either SH or AS were available at Genbank. The mapping percentage of SBS transcripts was quite low. Only 67.4% of SH PDA reads, 63.8% of SH PDB reads, and 33.3% of Interaction reads were mapped to the SH transcripts assembly, respectively (Table 2). Only 16.8% of AS only reads, and 5.7% of Interaction reads mapped to the AS transcripts library (Table 2). This is likely due to the short length of the SBS reads and stringent mapping parameters used in this experiment, which eliminated reads mapping to more than one location and did not allow for any base mismatches.

A Venn diagram was constructed to identify the distribution of the unique and common reads in both SBS and 454 SH, AS, and interaction libraries (Figure 1). There are discrepancies in the read distribution that appear between the SBS and the 454 libraries. The most obvious example is the increase in the number of reads that are unique to the SH-only library from 6.2% in the SBS to 58.9% in the 454 data. This is because there were more total SH reads in the 454 dataset, where four of the six libraries (69.8% of the reads) were constructed using RNA from *S. homoeocarpa* grown in pure culture. In the SBS dataset, only two out of four (31.7% of the reads) of the libraries were constructed from *S. homoeocarpa* grown in pure culture. The number of reads common to the interaction and control libraries was consistently low in both SBS and 454 datasets (Figure 1). The common reads are likely a result of similar sequences in both organisms, including those of transposable elements found in both organisms.

**Table 2.** Mapping characteristics of the *Sclerotinia homoeocarpa* (SH) and *Agrostis stolonifera* (AS) SBS reads to the SH and AS transcript assemblies.

| SBS Library                       | SH PDA    | SH PDB    | AS 96h    | Interaction |
|-----------------------------------|-----------|-----------|-----------|-------------|
| Number of Reads                   | 6,101,988 | 4,350,510 | 6,885,250 | 7,182,868   |
| Mapping Percentage to SH Assembly | 67.4%     | 63.8%     | 0.9%      | 33.3%       |
| Mapping Percentage to AS Assembly | 2.6%      | 2.4%      | 16.8%     | 5.7%        |

doi:10.1371/journal.pone.0041150.t002

**Table 1.** Characteristics of the 454 RNA-Seq data.

| Transcript Assembly | Sequencing Libraries Included | Number of Reads | Number of Isotigs | Mean Isotig Length (bp) | Number of Singletons |
|---------------------|-------------------------------|-----------------|-------------------|-------------------------|----------------------|
| <b>Total SH</b>     | SH PDA 96h                    | 600,760         | 10,101            | 1,172                   | 51,502               |
|                     | SH PDB 48h/96h/144h           |                 |                   |                         |                      |
|                     | Interaction 96h               |                 |                   |                         |                      |
| <b>Total AS</b>     | AS 966h                       | 205,403         | 5,017             | 898                     | 58,446               |
|                     | Interaction 96h               |                 |                   |                         |                      |

doi:10.1371/journal.pone.0041150.t001

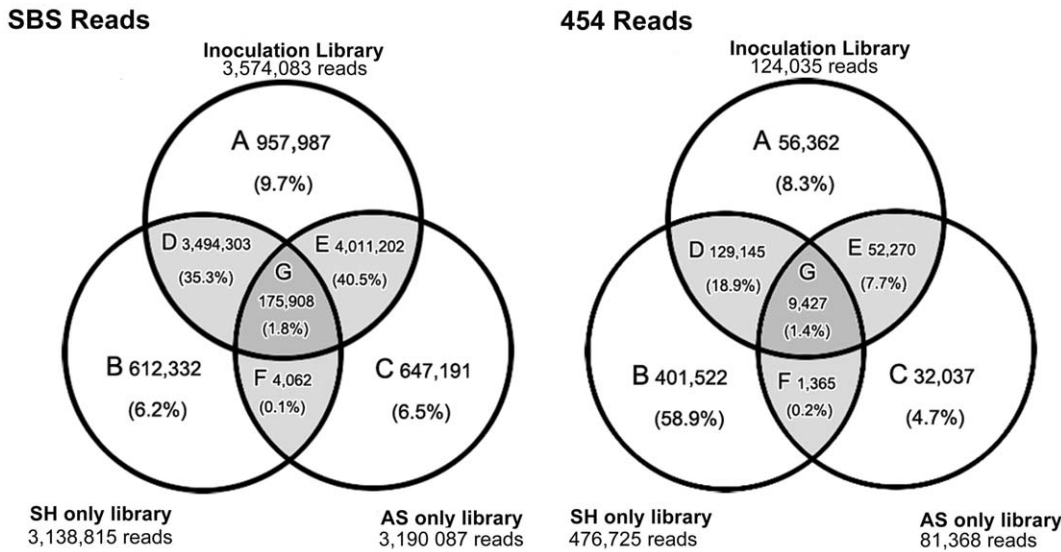

**Figure 1. Venn diagram of RNA-Seq reads unique and common to the SH library, AS library, and Interaction library.** A. Reads unique to the Inoculation library, B. Reads unique to the SH only library, C. Reads unique to the AS only library, D. Reads common to the Inoculation and SH library, E. Reads common to the Inoculation and AS library, F. Reads common to the SH and AS libraries, G. Reads common to the Inoculation, SH, and AS libraries.  
doi:10.1371/journal.pone.0041150.g001

**Comparative analysis**

The transcripts were blasted against the NCBI protein database for functional annotation using Blast2GO [20] blastx function. Fifty seven percent (5,257) of the 9,319 SH transcripts returned at least one annotation hit. Likewise, 57% (11, 551) of the 20, 293 AS transcripts returned at least one hit. From the blastn taxonomy report, top hits of the *S. homoeocarpa* sequences were primarily from *Sclerotinia sclerotiorum* (Lib.) de Bary (44. 1%) and *Botryotinia fuckeliana* (de Bary) Whetzel (34.9%) (Figure 2 a). This is not surprising considering their taxonomic similarity to *S. homoeocarpa*, and the abundance of *S. sclerotiorum* and *B. fuckeliana* sequence data available on GenBank. The 26 fungal species represented in the taxonomy report belong to various classes of the subphylum Pezizomycotina, with seven of the 26 species being pathogens of monocot plants. There were a small number of sequences related to monocots including rice (*Oryza sativa* Linnaeus, 1.6%), bamboo (*Phyllostachys edulis* (Carr.) Houz., 0.3%), and barley (*Hordeum vulgare* Linnaeus, 0.4%). We attributed this either to contamination of the fungal sequences by *A. stoloniifera* sequences in the interaction library, to the presence of very highly conserved sequences, or to the presence of sequences occurring in both organisms, such as those of transposable elements. The top blast hit species for the *A. stoloniifera* sequences included predominantly monocot grass species (Figure 2 b). Fungal sequences that were found included those of *Pyrenophora teres* Smed.-Pet. and *Phaeosphaeria nodorum* (E. Müll) Hedjar, pathogens of barley and wheat, respectively.

**Comparison of RPKM ratios to Relative Transcription ratios**

Reads Per Kilobase of exon model per Million mapped reads (RPKM) value was calculated of all SH and AS transcripts in different libraries and the Log<sub>2</sub> ratio was calculated to reflect the fold changes of interaction library compared to control libraries (SH PDA and AS only). Relative transcription data from real-time RT-PCR assays was obtained for selected transcripts with significantly different transcription levels during infection. The relative transcription data verified that the RPKM calculating and

statistical analysis of transcriptome data was accurate (Figure 3). The real time RT-PCR data confirms the upregulation of two fungal xylanases (SH\_5411 and SH\_5726), a fungal laccase (SH\_7961), and a creeping bentgrass germin protein (AS\_608) (Figure 2). Downregulated transcripts SH\_6925 (scytalone dehydrogenase) and SH\_8369 (β-mannosidase) were also verified (Figure 2).

**Transcripts Expression Analysis**

To identify transcripts that were up-regulated in the interaction condition, transcripts with statistically significant changes of RPKM values during infection were examined to determine if there were patterns in the types of genes with increased or decreased transcription level. Table 3 summarizes some of the types of SH transcripts of interest during infection including a long list of glycosyl hydrolase transcripts and various proteases. Table 4 summarizes transcripts of interest in the AS library including a long list of retrotransposons, defense-related proteins including 13 different germin-like proteins, and various enzymes involved in plant hormone synthesis and regulation. Interestingly, all jasmonate-induced protein transcripts were significantly down regulated at 96 hpi. A full list of SH and AS transcripts that are significantly over or under expressed during infection are available as supplementary data (Tables S1 and S2, respectively).

**Gene Ontology Analysis**

The list of significantly upregulated SH and AS transcripts were sorted into gene ontology (GO) term categories for molecular function, biological processes, and cellular component using the Blast2GO [20] program (Figures 4 and 5). The molecular function of GO terms associated with upregulated SH transcripts include a large percentage of plant cell-wall degrading enzymes categories (Figure 4 a) including polygalacturonase activity (4.0%), cellulase activity (5.1%), endopeptidase activity (4.0%), α-arabinofuranosidase activity (2.9%), and serine-type peptidase activity (5.1%). Other upregulated molecular function of GO terms included those for xenobiotic-transporting activity (5.1%) and oxidoreductase

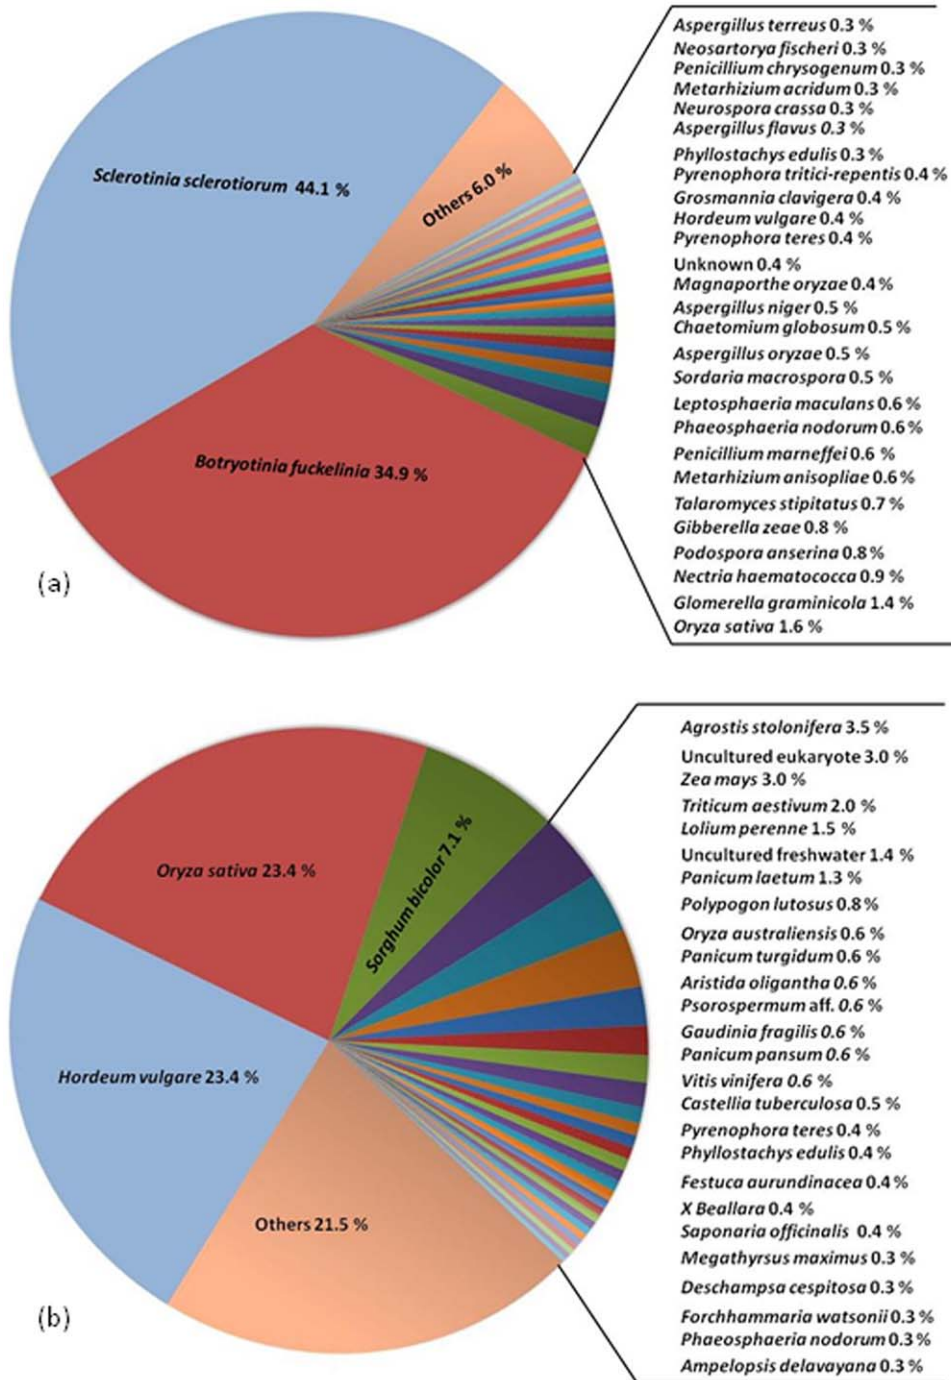

**Figure 2. Top Species Blast hits: (a) SH transcript library (b) AS transcript library.**  
doi:10.1371/journal.pone.0041150.g002

activity (7.4%). Biological process of upregulated SH transcript GO terms included auxin biosynthesis (11.4%), transmembrane transport (18.9%), and oxidation reduction (25.1%) (Figure 4 b). A majority of the upregulated SH cellular component GO terms were for those integral to the membrane (37.2%) and those for extracellular regions (34.0%) (Figure 4 c), perhaps reflecting the secretion of cell wall degrading enzymes and other secondary metabolites important for pathogenicity and virulence of *S. homoeocarpha*.

The molecular function of GO terms associated with the upregulated AS transcripts included those associated with hydrolase activity (19.2%), DNA binding activity (10.9%), and nucleotide binding (24.3%) (Figure 5 a). The biological process GO terms associated with the upregulated AS transcript library included those related to translation (10.8%), transport (14.6%), and DNA metabolic processes (11.1%) (Figure 5 b). Finally, an overwhelming number of cellular process GO terms from the AS upregulated library were associated with the mitochondrion (30.8%) and plastids (31.8%) (Figure 5 c).

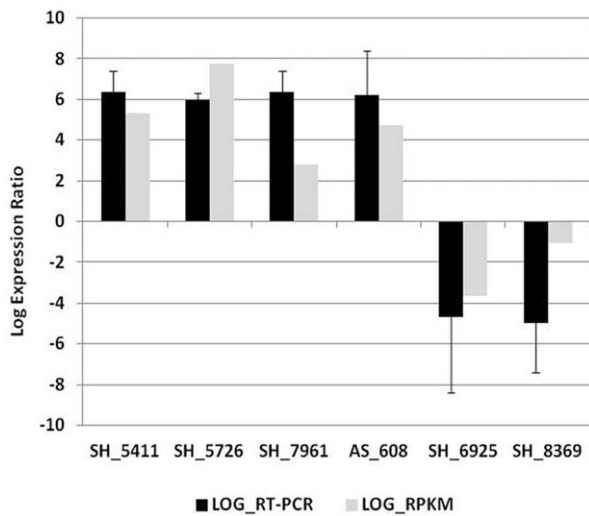

**Figure 3. Validation of RPKM data for selected SH and AS transcripts using relative expression real time PCR.**  
doi:10.1371/journal.pone.0041150.g003

### Conserved Domain Analysis

Protein domains were identified in the *S. homoeocarpa* and *A. stolonifera* transcripts libraries using HMMER software (v3.0) [21]. Also among SH transcripts, 1588 were predicted to contain signal peptide by signalP (v4.0) [22], and thus could be candidates for secreted proteins. Three proteases with secretion signals included two subtilisin/sedolisin proteases with log-fold increases of 6.4 and 6.2 as well as a cuticle degrading serine protease with a log-fold increase of 4.0. Conserved domains significantly enriched in the interaction library ( $P \leq 0.01$ ) are listed in Table 5 (SH conserved domains) and Table 6 (AS conserved domains). Domains enriched in the SH interaction library include a variety of glycosyl hydrolases, proteases domains, and transporters (Table 5). Domains of interest in the enriched AS interaction library include cytochrome P450, various ABC transporters, and cupin domains, which include germin-class enzymes (Table 6). A complete list of SH and AS conserved domains can be found as supplementary data in tables S3 and S4, respectively.

**Table 3. Summary of select *Sclerotinia homoeocarpa* transcript types that are significantly increased at 96 h post inoculation on creeping bentgrass.**

| Transcript Types           | Description              | Transcripts | Log fold change |
|----------------------------|--------------------------|-------------|-----------------|
| <b>Glycosyl hydrolases</b> | ferruloyl esterase       | 2           | 4.8–11.5        |
|                            | dihydroceramidase        | 1           | 3.1             |
|                            | amylase                  | 1           | 3.0             |
|                            | arabinofuranosidase      | 7           | 2.4–9.9         |
|                            | rhamnosidase             | 1           | 2.1             |
|                            | endoglucanase            | 4           | 2.9–5.7         |
|                            | glucosidase              | 4           | 3.1–4.9         |
|                            | xylosidase               | 5           | 2.6–5.3         |
|                            | cellobiohydrolase        | 4           | 4.3–6.9         |
|                            | cellobiose dehydrogenase | 1           | 4.1             |
|                            | cellulase                | 1           | 3.6             |
|                            | cutinase                 | 1           | 3.0             |
|                            | mannosidase              | 2           | 3.1–4.6         |
|                            | xylanase                 | 3           | 4.6–8.5         |
|                            | glucanase                | 8           | 2.2–7.3         |
|                            | polygalacturonase        | 3           | 3.0–8.1         |
|                            | rhamnogalacturonase      | 2           | 2.9–8.1         |
|                            | lysozyme                 | 1           | 5.7             |
|                            | pectinesterase           | 1           | 2.0             |
|                            | <b>Total</b>             |             | <b>52</b>       |
| <b>Proteases</b>           | serine protease          | 4           | 2.9–9.4         |
|                            | aspergillopepsin-2       | 1           | 2.3             |
|                            | peptidases               | 8           | 2.4–6.5         |
|                            | neutral protease         | 1           | 5.8             |
|                            | <b>Total</b>             | <b>14</b>   | <b>2.3–9.4</b>  |
| <b>Transporters</b>        | mdr-like abc transporter | 7           | 4.1–6.6         |
|                            | mfs multidrug            | 2           | 2.7–2.9         |
|                            | <b>Total</b>             | <b>9</b>    | <b>2.7–6.6</b>  |

doi:10.1371/journal.pone.0041150.t003



**Table 4.** Summary of select *Agrostis stolonifera* transcript types that are significantly increased at 96 h post inoculation with *Sclerotinia homoeocarpa*.

| Transcript Types                        | Product                      | Transcripts           | Log fold change |
|-----------------------------------------|------------------------------|-----------------------|-----------------|
| <b>Transposons</b>                      | athila retroelement          | 1                     | 5.8             |
|                                         | copla-type retroelement      | 2                     | 2.6–4.3         |
|                                         | gag-pol polyprotein          | 10                    | 2.4–4.9         |
|                                         | mutator-like transposase     | 1                     | 4.6             |
|                                         | retroelement pol poly        | 2                     | 2.2–2.7         |
|                                         | retrotransposon line         | 1                     | 3.0             |
|                                         | retrotransposon ty1-copia    | 6                     | 3.4–5.8         |
|                                         | retrotransposon ty3-gypsy    | 13                    | 2.5–8.6         |
|                                         | transposon en spm            | 15                    | 2.0–5.2         |
|                                         | unidentified transposon      | 2                     | 2.3–3.7         |
|                                         | retrotransposon unclassified | 18                    | 2.4–7.6         |
|                                         | <b>Total</b>                 | <b>72</b>             | <b>2.0–8.6</b>  |
|                                         | <b>Defense</b>               | anthranilate synthase | 1               |
| calcineurin                             |                              | 1                     | 3.5             |
| cinnamoyl reductase                     |                              | 1                     | 3.5             |
| cytochrome p450                         |                              | 5                     | 2.0–5.5         |
| disease resistance nbs- <i>lrr</i>      |                              | 3                     | 2.3–4.0         |
| e3 ubiquitin-protein ligase             |                              | 2                     | 3.7–4.0         |
| fusarium resistance, <i>i2c-5</i> -like |                              | 1                     | 2.9             |
| germin a                                |                              | 13                    | 3.4–6.2         |
| mdr abc transporter                     |                              | 6                     | 5.9–7.7         |
| pathogenesis associated pep2            |                              | 1                     | 9.1             |
| rust resistance kinase <i>lr10</i>      |                              | 1                     | 4.5             |
| terpene synthase                        |                              | 1                     | 2.9             |
| ubiquitin                               |                              | 2                     | 2.1–4.8         |
| ubiquitin-conjugating enzyme            |                              | 1                     | 2.1             |
| ubiquitin-specific protease             |                              | 1                     | 3.8             |
| zingiberene synthase                    |                              | 1                     | 2.8             |
| <b>Total</b>                            |                              | <b>47</b>             | <b>2.0–9.1</b>  |

doi:10.1371/journal.pone.0041150.t004

## Discussion

Previous analyses using RNA-Seq have evaluated the reproducibility and accuracy of SBS [18] and 454 data for RNA transcription studies [23]. Both technologies have demonstrated higher-quality results than microarray and EST data [18,19]. However, SBS technologies were found to be superior due to the greater coverage and depth of sequences for a much lower cost. In this study, the mapping percentage of the SBS data to the *S. homoeocarpa* assembly ranged from 33.3–67.4% and *A. stolonifera* mapping percentages ranged from 5.7–16.8%. The mapping percentages were low due to the very stringent parameters that eliminated all reads with even a single mismatch and reads that mapped to more than a single location, as well as possible transcriptome misassembly. The use of these parameters and their resulting influence on the statistical analysis of the RPKM data was verified with real-time relative expression data. Mapping uncertainty in RNA-Seq analyses is one of the pitfalls of the SBS sequencing method. Short sequence lengths, as was the case in this study, make it difficult to account for paralogous genes, alternatively spliced isoforms, and low complexity sequences, all

of which result in multireads that are eliminated in the mapping process [24]. Low mapping percentage may also be due to the lower coverage of 454 transcriptome assemblies compared to the high SBS coverage.

RNA-Seq analysis in this study has made it possible to identify potential pathogenicity factors transcribed by *S. homoeocarpa* during infection and colonization of *A. stolonifera*. The most striking discovery was the number of enriched *S. homoeocarpa* transcripts within the interaction library that encoded glycosyl hydrolase enzymes. In fact, 52 of the upregulated SH transcripts encoded glycosyl hydrolase genes and 22.3% of molecular function GO terms were associated with glycosyl hydrolase activity. Within the total SH transcript library, a keyword search using search terms such as glycosyl hydrolase, cellulase and pectinase revealed over 100 transcripts annotated as glycosyl hydrolases in the SH library, representing 85 different families of the total 125 glycosyl hydrolase families [25,26]. The numerous transcripts representing such a varied group of glycosyl hydrolase families corroborate the ability of this fungus to infect and cause disease on a wide range of plant hosts. In this study, *S. homoeocarpa* glycosyl hydrolase genes showing upregulation were predominantly xylanases and arabi-

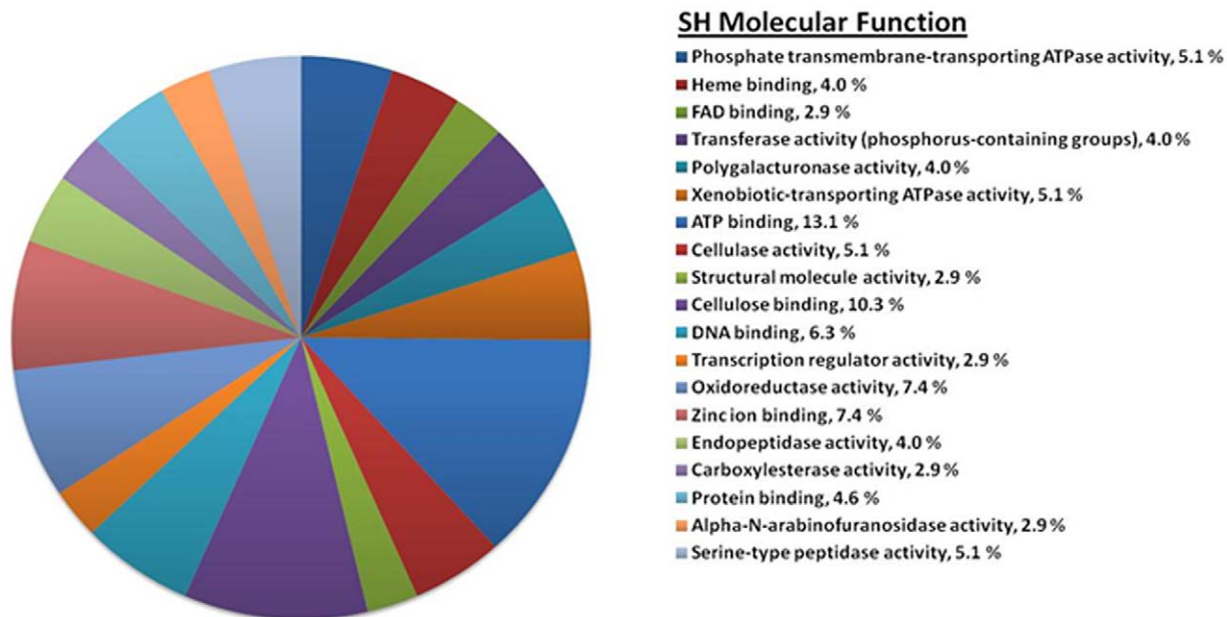

**Figure 4. GO terms associated with upregulated SH transcripts.** (a) Molecular Function, (b) Biological Process, (c) Cellular Component. doi:10.1371/journal.pone.0041150.g004

nases. This is not surprising since grass cell walls consist of approximately 40% xylans as well as glucuronoarabinoxylans (GAX) that make up a majority of monocot hemicelluloses [27]. Enzymes such as pectinases, xylanases, and cellulases are often virulence and pathogenicity factors for plant pathogenic fungi and bacteria. For example, *Botrytis cinerea* Pers. and *Septoria nodorum* (Berk) Berk., demonstrate reduced virulence when a single gene encoding a cell wall degrading enzyme is knocked-out [28,29,30]. However, the large number of upregulated and functionally redundant cell wall degrading enzymes expressed by *S. homoeocarpa* interacting with creeping bentgrass will make verifying the role of any one enzyme extremely difficult.

Numerous proteinases, mostly serine proteases, were also enriched in the fungal interaction library. Secretion signals were detected on three of the proteases of interest, including two subtilisin/sedolisin proteases and one identified as a cuticle degrading serine protease. These three secreted proteases were upregulated in the interactoin library by 4.0–6.4 log-fold. Of the molecular function GO terms, 5.1% were associated specifically with serine-protease activity. Serine proteases are pathogenicity determinants for a variety of pathogenic fungi including nematode-parasitizing fungi, entomopathogens, and plant pathogenic fungi [31]. For example, protease deficient mutants of the hemibiotroph *Pyrenopeziza brassicae* B. Sutton & Rawl. were either avirulent or had dramatically reduced virulence [32]. Proteases in other plant pathogenic fungi have been characterized, but their role in pathogenicity has not necessarily been confirmed in each case [33,34].

In general, the presence of a variety of hydrolytic enzymes including glycosyl hydrolases and proteinases supports the broad host range reported for *S. homoeocarpa* [1]. The diversity and number of enzymes also support saprophytic ability of *S. homoeocarpa* [35]. For example, fungi with superior saprotrophic abilities, such as *Aspergillus* spp. were found to produce a more diverse collection of hydrolytic enzymes under a variety of conditions, while phytopathogens with inferior saprophytic abilities such as *Verticillium albo-atrum* Reinke & Berthold and *V. lecanii* (Zimm.) Viégas, produced a more targeted array of enzymes suited

to their particular host range [35]. The large number of hydrolytic enzymes expressed by *S. homoeocarpa* supports the hypothesis of superior saprophytic abilities of the dollar spot pathogen, which may play a role in the overwintering of the fungus within the thatch during the winter months.

Multi-drug resistance (MDR) ATP binding cassette (ABC) transporter proteins were also upregulated in the *S. homoeocarpa* interaction library, with seven of the MDR-ABC transporters being upregulated while only one MDR-ABC transporter transcript was downregulated. Members of the MDR-ABC transporter family have important roles in fungicide resistance, resistance to plant defense compounds and efflux of endogenous toxins [36,37]. In *B. cinerea*, both ABC and MFS transporters have been implicated in resistance of the pathogen to a variety of fungicides including phenylpyrroles, azoles, anilopyrimidines, dicarboximides, and strobilurins [38,39,40]. The ABC transporter BcatrB of *B. cinerea* is strongly induced in the presence of fludioxonil, cyprodinil, cyproconazole, tebuconazole, and trifloxystrobin suggesting a role for this single transporter in resistance to multiple fungicide types [41]. Enrichment of a variety of transport proteins with similar function in the *S. homoeocarpa* interaction library may provide an explanation for the development of isolates that are resistant to more than one fungicide class. For example, isolates are known that are resistant to demethylation inhibitors as well as benzimidazoles and dicarboximides [1,42,43]. Aside from fungicide resistance, ABC transporters are also implicated in resistance to plant defense compounds and secretion of fungal toxins. For example, BcatrB not only provides resistance to fungicides but also to the plant defense compounds resveratrol and camalexin [39,40]. Characterization of these transporter proteins could lead to a better understanding of fungicide resistance mechanisms and *S. homoeocarpa*-creeping bentgrass interactions, resulting in more effective fungicide application programs and fungicide resistance management strategies.

Integrated fungicide resistance management recommendations often include using cultivars of grass that have increased pathogen resistance. Several cultivars of creeping bentgrass have decreased susceptibility to dollar spot disease [44,45]; however, the molecular

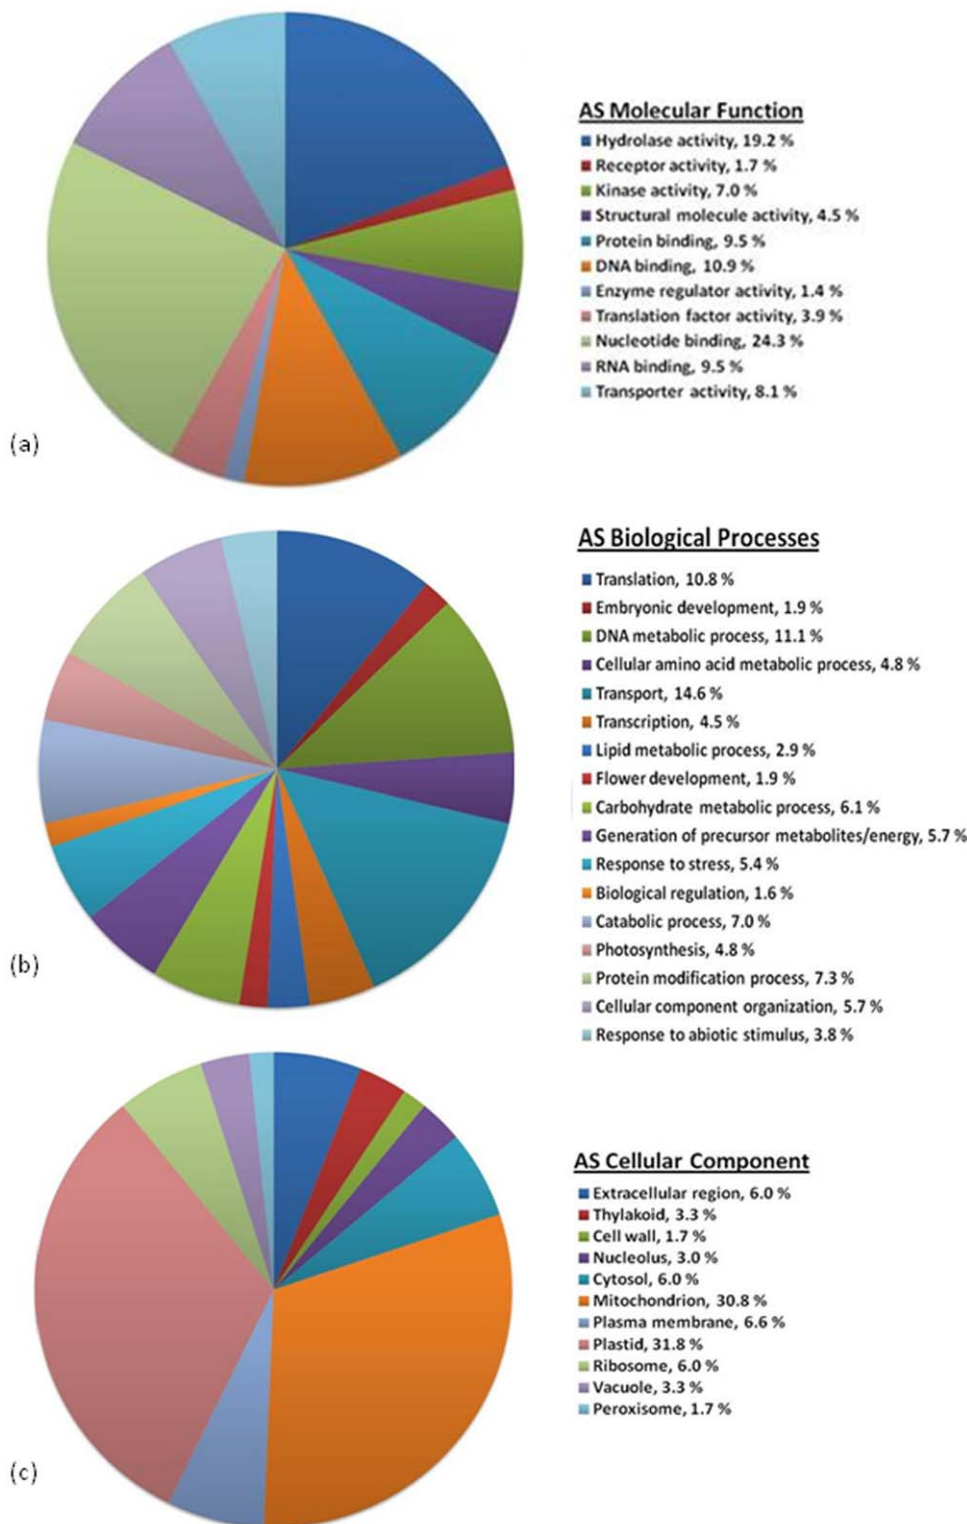

**Figure 5. GO terms associated with upregulated AS transcripts.** (a) Molecular Function, (b) Biological Process, (c) Cellular Component. doi:10.1371/journal.pone.0041150.g005

defense mechanisms responsible for the decrease in susceptibility are unknown. In this study, some of the most prominent, upregulated defense-related transcripts were the germin and germin-like proteins. Germins belong to the cupin superfamily and include the important defense enzyme, oxalate oxidase [46].

Germin-type oxalate oxidases are enzymes that are unique to Gramineae plants [46]. In creeping bentgrass cultivars, oxalate oxidase has been shown to be more active in the moderately resistant creeping bentgrass cultivar, L-93, compared to Crenshaw, a highly susceptible cultivar [47]. Oxalic acid is a pathoge-



**Table 5.** Top enriched *Sclerotinia homoeocarpa* domains at 96 h post inoculation on creeping bentgrass.

| Domain name     | Enrichment | P-value | Description                                                 |
|-----------------|------------|---------|-------------------------------------------------------------|
| Glyco_hydro_45  | 17.0       | 0.0030  | Endoglucanase                                               |
| Glyco_hydro_62  | 17.0       | 0.0030  | Alpha -L-arabinofuranosidase                                |
| Glyco_hydro_61  | 15.3       | <0.0001 | Endoglucanase                                               |
| Peptidase_S28   | 13.6       | 0.0010  | Serine carboxypeptidase S28                                 |
| CBM_1           | 13.4       | <0.0001 | Fungal cellulose binding domain                             |
| E1_DerP2_DerF2  | 12.8       | 0.0003  | Lipid recognition, recognition of pathogen products         |
| Pectinesterase  | 12.8       | 0.0003  | Pectinesterase                                              |
| Eno-Rase_NADH_b | 12.2       | 0.0003  | NAD(P)H binding domain, trans-2-enoyl-CoA reductase         |
| Glyco_hydro_43  | 11.4       | <0.0001 | Arabinanase                                                 |
| COX3            | 11.4       | 0.0016  | Cytochrome c oxidase subunit III                            |
| Flavodoxin_2    | 11.4       | 0.0016  | Flavodoxin-like fold                                        |
| Glyco_hydro_11  | 11.4       | 0.0016  | Xylanases                                                   |
| Glyco_hydro_12  | 11.4       | 0.0016  | Endoglucanase and xyloglucan hydrolase                      |
| Nucleoplasmin   | 11.4       | 0.0016  | Chromatin decondensation proteins                           |
| PLA2_B          | 11.4       | 0.0016  | Lysophospholipase catalytic domain                          |
| Glyco_hydro_28  | 11.0       | <0.0001 | Polygalacturonase, Rhamnogalacturonase A                    |
| ABC_ATPase      | 10.8       | <0.0001 | Predicted ATPase of the ABC class                           |
| Syja_N          | 10.2       | 0.0006  | Sacl homology domain                                        |
| Cellulase       | 9.7        | 0.0023  | Cellulase                                                   |
| CFEM            | 9.7        | 0.0023  | Cysteine rich, putative role in fungal pathogenesis         |
| Flavodoxin_5    | 8.5        | 0.0030  | Flavodoxin                                                  |
| FMN_red         | 8.5        | 0.0030  | NADPH-dependent FMN reductase                               |
| Glyco_hydro_7   | 8.5        | 0.0030  | Endoglucanase; cellobiohydrolase                            |
| Glyco_hydro_92  | 8.5        | 0.0030  | Alpha-1,2-mannosidases                                      |
| Mannosyl_trans3 | 8.5        | 0.0030  | Mannosyltransferase putative                                |
| Yos1            | 8.5        | 0.0030  | Transport between ER and the Golgi complex                  |
| 7tm_1           | 8.5        | 0.0089  | 7 transmembrane receptor                                    |
| Chorismate_synt | 8.5        | 0.0089  | Chorismate synthesis                                        |
| COX6B           | 8.5        | 0.0089  | Cytochrome oxidase c subunit VIb                            |
| Cu-oxidase_2    | 8.5        | 0.0089  | Multicopper oxidase                                         |
| Cupin_5         | 8.5        | 0.0089  | Cupin superfamily                                           |
| DHDPS           | 8.5        | 0.0089  | Dihydrodipicolinate synthetase family                       |
| Fig1            | 8.5        | 0.0089  | Ca <sup>2+</sup> regulator and membrane fusion protein Fig1 |
| Metallophos_2   | 8.5        | 0.0089  | Calcineurin-like phosphoesterase                            |
| Pex2_Pex12      | 8.5        | 0.0089  | N terminal of a number of known and predicted peroxins      |
| Ribosomal_L35Ae | 8.5        | 0.0089  | Ribosomal protein L35Ae                                     |
| SAPS            | 8.5        | 0.0089  | SIT4 phosphatase-associated protein                         |
| UbiA            | 8.5        | 0.0089  | UbiA prenyltransferase family                               |
| ABC_membrane    | 8.2        | <0.0001 | ABC transporter transmembrane region                        |
| Fungal_lectin   | 6.8        | 0.0061  | Fungal fucose-specific lectin                               |
| OPT             | 6.2        | 0.0080  | OPT oligopeptide transporter protein                        |
| Peptidase_S8    | 6.1        | <0.0001 | Subtilase family                                            |
| ABC_tran        | 5.8        | <0.0001 | ABC transporter                                             |

doi:10.1371/journal.pone.0041150.t005

nicity factor for *Sclerotinia sclerotiorum* (Lib.) de Bary [48], and oxalic acid is produced in large quantities by *S. homoeocarpa* as well [49]. Cloning oxalate oxidase into dicot hosts such as sunflower, soybean, canola, and tomato renders them resistant to *S. sclerotiorum* [50,51,52]. It is possible that increased production of

oxalate oxidases by some cultivars of creeping bentgrass is responsible for their decreased susceptibility to *S. homoeocarpa*. Furthermore, the product of oxalate oxidase activity is H<sub>2</sub>O<sub>2</sub>, a plant defense signal that is capable of passing through cell membranes, is directly toxic to invading microorganisms, cross-

**Table 6.** Top enriched *Agrostis stolonifera* domains at 96 h post inoculation with *Sclerotinia homoeocarpa*.

| Domain name     | Enrichment | P-value | Description                                              |
|-----------------|------------|---------|----------------------------------------------------------|
| eIF-5_eIF-2B    | 20.2       | <0.0001 | Zinc binding C4 finger.                                  |
| ATS3            | 20.2       | 0.002   | Embryo-specific protein 3                                |
| BDS_I_II        | 20.2       | 0.002   | Antihypertensive protein BDS-I/II                        |
| CSD             | 20.2       | 0.002   | 'Cold-shock' DNA-binding domain                          |
| Folate_rec      | 20.2       | 0.002   | Folate receptor family                                   |
| MaoC_dehydratas | 20.2       | 0.002   | Synthesis of monoamine oxidase                           |
| SH3_1           | 20.2       | 0.002   | Signal transduction related to cytoskeletal organisation |
| TAFII28         | 20.2       | 0.002   | Assembly of the transcription preinitiation complex.     |
| ABC2_membrane_3 | 15.1       | <0.0001 | ABC-2 type transporter                                   |
| Fer4            | 13.5       | <0.0001 | Iron sulfur binding domain                               |
| Fer4_2          | 13.5       | <0.0001 | Iron sulfur binding domain                               |
| Fer4_6          | 13.5       | <0.0001 | Iron sulfur binding domain                               |
| Ribosomal_S2    | 13.5       | <0.0001 | Ribosomal protein S2                                     |
| CALCOCO1        | 13.5       | 0.0077  | Calcium binding and coiled-coil domain (CALCOCO1)        |
| iPGM_N          | 13.5       | 0.0077  | independent phosphoglycerate mutase                      |
| tRNA-synt_1c    | 12.6       | <0.0001 | tRNA synthetases class I (E and Q), catalytic domain     |
| TMF_DNA_bd      | 12.1       | 0.0004  | TATA element modulatory factor 1 DNA binding             |
| UDPGT           | 12.1       | 0.0004  | UDP-glucuronosyl and UDP-glucosyl transferase            |
| Cupin_1         | 11.9       | <0.0001 | Cupins, including germins                                |
| Cupin_2         | 11.1       | <0.0001 | Cupin domain                                             |
| ABC2_membrane   | 10.9       | <0.0001 | ABC-2 type transporter                                   |
| GrpE            | 10.1       | 0.0011  | GrpE nucleotide exchange factor                          |
| EFG_C           | 9.0        | 0.0002  | Elongation factor G C-terminus                           |
| GTP_EFTU_D3     | 8.8        | <0.0001 | Elongation factor Tu C-terminal domain                   |
| ABC_ATPase      | 8.7        | <0.0001 | Predicted ATPase of the ABC class                        |
| IF-2B           | 8.7        | 0.0025  | Initiation factor 2 subunit family                       |
| RNA_pol_Rpb1_5  | 8.7        | 0.0025  | RNA polymerase Rpb1, domain 5                            |
| Cytochrom_B_C   | 7.6        | 0.0049  | Cytochrome b/b6, C-terminal                              |
| SMC_N           | 7.3        | <0.0001 | structural maintenance of chromosomes protein            |
| ABC_membrane    | 6.7        | <0.0001 | ABC transporter transmembrane region                     |
| ATP-synt_C      | 6.7        | 0.0086  | ATP synthase subunit C                                   |
| ATP-synt_ab_C   | 6.7        | 0.0012  | ATP synthase alpha/beta chain                            |
| DUF1602         | 6.1        | <0.0001 | Protein of unknown function                              |
| GTP_EFTU        | 5.8        | <0.0001 | Elongation factor Tu GTP binding domain                  |
| ABC_tran        | 5.5        | <0.0001 | ABC transporters                                         |
| Terpene_synth_C | 5.4        | 0.0049  | Terpene synthase family, metal binding domain            |
| p450            | 5.0        | <0.0001 | Oxidative degradation of compounds                       |
| GTP_EFTU_D2     | 5.0        | 0.0005  | Elongation factor Tu domain 2                            |

doi:10.1371/journal.pone.0041150.t006

links glycoproteins and phenolic molecules to form defense structures, and can induce systemic acquired resistance [53,54]. Clearly, more research on germin-like proteins and oxalate oxidase activity in creeping bentgrass is warranted.

In addition to the plant defense-related transcripts, other notable creeping bentgrass transcripts were identified as transposons and retrotransposons including pong, em, mutator, gypsy, and copia subclasses. This is not surprising since it has been documented that transposons make up approximately 80% of the DNA in cereal crops [55]. In a recent EST analysis of creeping bentgrass and colonial bentgrass, 1.4% and 0.18% of the total

ESTs were retrotransposon related, and retrotransposon transcripts were eight times higher in creeping bentgrass under disease stress than in healthy colonial bentgrass plants that were not under disease stress [56]. In the RNA-Seq data analysed here, 878 of 20,493 (4%) of the total AS transcripts were identified as transposons and 731 (3.5%) were identified as retrotransposons. Seventy-two of the 1017 transcripts upregulated in the interaction library were identified as retrotransposons: that is 7% of all upregulated AS transcripts. This is in clear support of the previous study concluding that retrotransposons in creeping bentgrass are likely activated by disease stress [56]. In the shared library (reads

present in both AS and SH), only 0.1% of the reads mapped to transcripts identified as transposons. This means that it is not likely that identical transposon sequences are shared between SH and AS. However, several of the classes of retrotransposons identified in the study, such as the *Ty* and  *copia* classes, are known to exist in both fungi and plants [57,58]. The upregulation of 72 retrotransposons in this study provides direct support for activation of transposons in creeping bentgrass in response to disease stress as demonstrated previously [56].

It has been reported that retrotransposons are transcriptionally activated in plants that are undergoing stress such as during protoplast formation, wounding, and in the presence of salicylic acid and jasmonate [59]. The influence of retrotransposons, if any, on plant defense pathways has not yet been determined; however, their increased transcription during infection should be investigated. For example, it would be interesting to determine if any of these retroelements are located within or near genes involved in plant defense responses, where they could affect the expression of these genes.

The RNA-Seq analysis presented in this study demonstrates the immense value of MPS technology for developing a comprehensive understanding of disease pathosystems. Advances in SBS technology since the start of this study would now provide adequate read length and depth for the *de novo* transcriptome assemblies, making it even more powerful and cost efficient. The resulting data analysis will be used to support future research efforts to characterize *S. homoeocarpa* virulence factors and creeping bentgrass defense-related transcripts.

## Materials and Methods

### Preparation of RNA for SBS Libraries

*Sclerotinia homoeocarpa* isolate MB01 was isolated from creeping bentgrass at The Ohio State University Turfgrass Research and Education Facility in Columbus, Ohio. The fungus was cultured on potato dextrose agar (PDA, Difco, Franklin Lakes, NJ) and 5 mm plugs of actively growing mycelium were transferred to potato dextrose broth (PDB, Difco) medium and incubated at 26°C with shaking at 160 rpm for 96 h. Cultures grown on PDA overlaid with cellophane membranes were also used for SBS library construction. At 96 h, mycelia were filtered from PDB or scraped from the cellophane membrane on PDA, and total RNA was extracted using TriReagent (Sigma, St. Louis, MO) according to manufacturer's instructions. For interaction and creeping bentgrass libraries, creeping bentgrass cv. Crenshaw was grown in a growth chamber at 26°C day and 22°C night temperatures with a 12 h photoperiod and at 70% relative humidity. Three-week old seedlings were challenged with millet seeds colonized by *S. homoeocarpa* MB01. These plants were incubated in clear bags to create humidity for 48 h after which the plants were uncovered during the day and bagged again for the night. After 96 h, leaves from inoculated and noninoculated plants were harvested, homogenized in liquid nitrogen, and RNA was extracted using TriReagent (Sigma) according to the manufacturer's instructions.

The SBS library templates were prepared using the Illumina Duplex-Specific thermostable nuclease (DSN) normalization kit and were analyzed using the Illumina Genome Analyzer I (GAI) at the Molecular and Cellular Imaging Center of The Ohio State University in Wooster, Ohio. The resulting libraries included a 96 h PDB culture control, a 96 h PDA culture control, a 96 h creeping bentgrass control, and a 96 h *S. homoeocarpa* – creeping bentgrass interaction library.

### Preparation of RNA for 454 Libraries

*S. homoeocarpa* isolate MB01 was cultured on PDA and 5 mm plugs of actively growing mycelium were transferred to PDB medium and incubated at 26°C with shaking at 160 rpm for 48, 96, or 144 h. At each time point, mycelia were filtered and total RNA was extracted using TriReagent (Sigma) according to manufacturer's instructions. For interaction and creeping bentgrass libraries, creeping bentgrass cv. Crenshaw was grown in a growth chamber as described previously. Three-week old seedlings were inoculated in one of two ways: with a 5 mm plug of actively growing mycelium from a PDA culture or misting of a mycelia homogenate, in water, from a 96 h PDB culture of *S. homoeocarpa* MB01. These plants were incubated as described for SBS library preparation. After 96 h, leaves from inoculated and noninoculated plants were harvested, homogenized in liquid nitrogen, and RNA was extracted using TriReagent according to the manufacturer's instructions. Total RNA was sent to the Core Genomics Facility at Purdue University, Indiana for preparation and sequencing using Roche GS-FLX (454) sequencer with Titanium chemistry. Seven RNA-Seq libraries were prepared that included *S. homoeocarpa* PDB cultures at 48, 96, and 144 h after inoculation, *S. homoeocarpa* grown on PDA at 96 h, creeping bentgrass noninoculated controls, and for creeping bentgrass incubated for 96 h with *S. homoeocarpa* applied as a PDA culture plug or a mycelia homogenate in water.

### Sequencing, Assembly, and Library Construction

The 454 raw sequence reads were assembled using GS Data Analysis Software (v2.5, Roche, Indianapolis, IN) after removal of adaptor sequences. *S. homoeocarpa* (SH) reads from the PDA, PDB, and 96 hpi Interaction libraries, and the *A. stolonifera* (AS) reads from the 96 h control and 96 h Interaction libraries were assembled using GS *de novo* assembler (v2.5, Roche) with parameter setting as 90% identity and a minimum 40 bp overlap. To eliminate SH reads in AS assembly library, reads from the *S. homoeocarpa* (SH) Interaction libraries that matched creeping bentgrass (*Agrostis stolonifera*) GenBank EST data were removed from the SH transcript assembly. Then reads from the *A. stolonifera* (AS) Interaction library matching SH assembly were also removed. Both *S. homoeocarpa* and *A. stolonifera* transcriptome assembly as used in this study was submitted to GenBank TSA database (Accession: PRJNA84359).

Full length SBS reads were directly mapped to the SH and AS transcriptome libraries using the Maq (v 0.7) [60] alignment. Mapping parameters allowed for only unique mapped reads with no mismatches. The number of mapped SBS reads for each transcript was counted by “soap.coverage” in SOAPAligner package.

### Transcript Expression Analysis

RPKM values were calculated for each transcript by dividing number of mapped reads by length of the transcripts and number of total sequenced reads in this library. Fisher's Exact Test, a test used for analyzing unreplicated transcript data [61] was used to determine statistical significance of transcript RPKM value change. The test was done using a pairwise comparison of Interaction RPKM values versus RPKM from fungus grown on PDA, or for Interaction RPKM values versus uninoculated control grass RPKM values. The fungal data contained 9,319 unique annotated transcripts and the grass data contained 20,293 unique annotated transcripts. Therefore, the statistical significance of the Fisher's Test was evaluated against a Bonferroni corrected *P*-value of  $1.86 \times 10^{-5}$  and  $2.43 \times 10^{-6}$  for fungal and grass transcripts, respectively. Furthermore, only transcripts with at least 2-log fold

change in transcript abundance were selected as upregulated. These conservative criteria were applied to avoid false positives.

The log-fold RPKM values of selected transcripts were validated using real time reverse transcription polymerase chain (RT-PCR) reaction on an iQ5 real time thermocycler (Biorad, Hercules, CA). RNA was extracted from fungus grown on PDA, noninoculated grass, and infected grass according to the previously described methods. RNA was extracted using Trizol (Invitrogen, Carlsbad, CA) and RNA extracts were treated with RQ1 DNase (Promega, St. Louis Obispo, CA) according to the manufacturer's directions, except that RNase Inhibitor (Promega) was added to each 100 µl of RNA extract. Complementary DNA was created from 1 µg of total RNA using iScript (BioRad, Hercules, CA). PCR was conducted using the SYBR supermix (Biorad) as per manufacturer's directions. The cycle conditions were 95°C for 3 minutes followed by 40 cycles of 95°C for 30 s, 58.5°C for 30 s, and 72°C for 30 s. The melting temperature profiles and gel electrophoresis was used to evaluate the specificity of the reactions and the absence of primer dimers. Real time RT-PCR was conducted with three biological replicates for each of grass, interaction, and fungal cDNA samples. Three technical replicates of each cDNA sample were used in each experiment.

Reaction efficiency and relative expression data were analyzed using the relative expression software tool (REST) program (Qiagen; [62]). Log base two values of relative expression ratios calculated in the REST program and the corresponding log base two RPKM expression ratios were compared graphically.

## Library annotation

Taxonomic and functional annotation of the SH and AS transcripts were conducted by using Blast2GO [20] software to run blastx and blastn algorithms against non-redundant nucleotide/protein database from the National Center for Biotechnology Information (National Institutes of Health). Within the SH library, any transcripts that resulted in top blastn hit species of *Hordeum*, *Oryza*, *Sorghum*, *Agrostis*, or *Vitis* were removed. Similarly, any transcripts in the AS library that had top blastn hit species of *Sclerotinia*, *Botryotinia*, *Glomerella*, *Ajellomyces*, or *Nectria* were removed. Combined graphs for GO terms associated with statistically upregulated transcripts are presented in the results section.

## References

- Walsh B, Ikeda S, Boland GJ (1999) Biology and management of dollar spot (*Sclerotinia homoeocarpa*); an important disease of turfgrass. HortScience 34: 13–21.
- Chakraborty N, Chang T, Casler MD, Jung G (2006) Response of bentgrass cultivars to isolates representing 10 vegetative compatibility groups. Crop Science 46: 1237–1244.
- Pigati RL, Dernoeden PH, Grybauskas AP, Momen B (2010) Simulated rainfall and mowing impact fungicide performance when targeting dollar spot in creeping bentgrass. Plant Disease 94: 596–603.
- Burpee LL, Gouly LG (1986) Evaluation of two dollarspot forecasting systems for creeping bentgrass. Canadian Journal of Plant Science 5: 345–351.
- Couch HB, Bloom JR (1960) Influence of environment on disease of turfgrasses. II. Effect of nutrition, pH, and soil moisture on *Sclerotinia* Dollar Spot. Phytopathology 257: 761–765.
- Hall R (1984) Relationship between weather factors and dollar spot of creeping bentgrass. Canadian Journal of Plant Science 64: 167–174.
- Orshinsky AM (2010) Characterization of the growth and host colonization of virulent, asymptomatic, and hypovirulent isolates of *Sclerotinia homoeocarpa*. Guelph: University of Guelph. 203 p.
- Endo RM (1966) Control of dollar spot of turfgrass by nitrogen and its probable basis. Phytopathology 56: 877.
- Monteith J, Dahl AS (1932) Turfgrass diseases and their control. Bulletin of the United States Golf Association 12: 85.
- Orshinsky AM, Boland GJ (2011) *Ophiostoma mitovirus 3a*, ascorbic acid, glutathione, and photoperiod affect the development of stromata and apothecia by *Sclerotinia homoeocarpa*. Canadian Journal of Microbiology 57: 398–407.

## Conserved Domain Analysis

Transcript sequences were translated to proteins in all 6 possible frames, and conserved protein domains were identified using HMMER (v3.0) [21] to screen the Pfam-A database. All the predicted domains with E-value <0.01 were reported. There were a total of 14,161 domains identified in the SH transcripts assembly and 18,591 domains identified in the AS transcripts assembly. The enrichment ratio and significant value was calculated based on a Fisher's Exact Test. Descriptions for enriched domains were found on the Pfam website.

## Supporting Information

**Table S1 A complete list of *Sclerotinia homoeocarpa* transcripts that are over or under represented at 96 h post inoculation on creeping bentgrass.**

(XLSX)

**Table S2 A complete list of *Agrostis stolonifera* transcripts that are over or under represented at 96 h post inoculation with *Sclerotinia homoeocarpa*.**

(XLSX)

**Table S3 A complete list of *Sclerotinia homoeocarpa* predicted protein conserved domains.**

(XLSX)

**Table S4 A complete list of *Agrostis stolonifera* predicted protein conserved domains.**

(XLSX)

## Acknowledgments

The authors of this study would like to acknowledge the Molecular and Cellular Imaging Center located at the Ohio Agricultural Research and Development Center in Wooster, Ohio for conducting SBS sequencing using Illumina sequencer. We would also like to acknowledge the Genomics Facility at Purdue University for conducting the 454 pyrosequencing and for subsequent troubleshooting advice.

## Author Contributions

Conceived and designed the experiments: MJB TKM VRC. Performed the experiments: VRC AMO JH. Analyzed the data: AMO JH SO. Contributed reagents/materials/analysis tools: MJB TKM SO. Wrote the paper: AMO JH.

- Hsiang T, Mahuku GS (1999) Genetic variation within and between southern Ontario populations of *Sclerotinia homoeocarpa*. Plant Pathology 48: 83–94.
- Endo RM (1963) Influence of temperature on rate of growth of five fungus pathogens of turfgrass and on rate of disease spread. Phytopathology 53: 857–877.
- Bandara-Herath HMT, Herath WHMW, Carvalho P, Khan SI, Tekwani BL, et al. (2009) Biologically active tetranortriterpenoids from the fungus *Sclerotinia homoeocarpa* causal agent of dollar spot in turfgrass. Journal of Natural Products 72: 2091–2097.
- Bonos SA, Buckley RJ, Clarke BB (2007) An integrated approach to dollar spot disease in turfgrasses. New Brunswick, NJ: Rutgers Cooperative Extension.
- Latin R (2009) Turfgrass disease profiles: Dollar Spot. West Lafayette: Purdue Extension.
- Huse SM, Huber JA, Morrison HG, Sogin ML, Welch D (2007) Accuracy and quality of massively parallel DNA pyrosequencing. Genome Biology 8: R143.
- Birch P, Kamoun S (2000) Studying interaction transcriptomes: coordinated analyses of gene expression during plant-microorganism interactions. New technologies for life sciences: A Trends Guide 0: 1471–1931.
- Marioni JC, Mason CE, Mane SM, Stephens M, Gilad Y (2008) RNA-seq: An assessment of technical reproducibility and comparison with gene expression arrays. Genome Research 18: 1509–1517.
- Wang Z, Gerstein M, Snyder M (2009) RNA-Seq: a revolutionary tool for transcriptomics. Nature Reviews: Genetics 10: 57–63.

20. Conesa A, Gotz S, Garcia-Gomez JM, Terol J, Talon M, et al. (2005) Blast2GO: a universal tool for annotation, visualization and analysis in functional genomics research. *Bioinformatics* 21: 3674–3676.
21. Finn RD, Clements J, Eddy SR (2011) HMMER web server: interactive sequence similarity searching. *Nucleic Acids Research* 39: W29–W37.
22. Petersen TN, Brunak S, von Heijne G, Nielsen H (2011) SignalP 4.0: discriminating signal peptides from transmembrane regions. *Nature Methods* 8: 785–786.
23. Vera JC, Wheat CW, Fescemyer HW, Frilander MJ, Crawford DL, et al. (2008) Rapid transcriptome characterization for a nonmodel organism using 454 pyrosequencing. *Molecular Ecology* 17: 1636–1647.
24. Li B, Ruotti V, Stewart RM, Thomson JA, Dewey CN (2009) RNA-Seq gene expression estimation with read mapping uncertainty. *Bioinformatics* 26: 493–500.
25. Henrissat B (1991) A classification of glycosyl hydrolases based on amino acid sequence similarities. *Biochemical Journal* 280: 309–316.
26. Henrissat B, Bairocht A (1993) New families in the classification of glycosyl hydrolases based on amino acid sequence similarities. *Biochemical Journal* 293: 781–788.
27. Vogel J (2008) Unique aspects of the grass cell wall. *Current Opinion in Plant Biology* 11: 301–307.
28. Kars I, van Kan JAL (2007) Extracellular enzymes and metabolites involved in pathogenesis of *Botrytis*. Elad Y, Williamson, B., Tudzynski, P., and Delen, N., editor. Norwell, MA, USA: Kluwer Academic Publishers.
29. Rowe HC, Kliebenstein DJ (2007) Elevated genetic variation within virulence-associated *Botrytis cinerea* polygalacturonase loci. *Molecular Plant-Microbe Interactions* 20: 1126–1137.
30. Lehtinen U (1993) Plant cell-wall degrading enzymes of *Septoria nodorum*. *Physiological and Molecular Plant Pathology* 43: 121–134.
31. Li J, Yu L, Yang J, Dong L, Tian B, et al. (2010) New insights into the evolution of subtilisin-like serine protease genes in Pezizomycotina. *BMC Evolutionary Biology* 10: 68.
32. Ball AM, Ashby AM, Daniels MJ, Ingram DS, Johnstone K (1991) Evidence for the requirement of extracellular protease the pathogenic interaction of *Pyrenopeziza brassicae* with oilseed rape. *Physiological and Molecular Plant Pathology* 38: 147–161.
33. Dobinson KF, Lecomte N, Lazarovits G (1997) Production of an extracellular trypsin-like protease by the fungal plant pathogen *Verticillium dahliae*. *Canadian Journal of Microbiology* 43: 228–233.
34. Sreedhar L, Kobayashi DY, Bunting TE, Hillman BI, Belanger FC (1999) Fungal proteinase expression in the interaction of the plant pathogen *Magnaporthe poae* with its host. *Gene* 235: 121–129.
35. St. Leger RJ, Roberts DW (1997) Adaptation of proteases and carbohydrases of saprophytic, phytopathogenic and entomopathogenic fungi to the requirements of their ecological niches. *Microbiology* 143: 1983–1992.
36. de Waard MA, Andrade AC, Hayashi K, Schoonbeek H-j, Stergiopoulos I, et al. (2006) Impact of fungal drug transporters on fungicide sensitivity, multidrug resistance and virulence. *Pest Management Science* 62: 195–207.
37. Del Sorbo G, Schoonbeek H-j, De Waard MA (2000) Fungal transporters involved in efflux of natural toxic compounds and fungicides. *Fungal Genetics and Biology* 30: 1–15.
38. Kretschmer M, Leroch M, Mosbach A, Walker A-S, Fillinger S, et al. (2009) Fungicide-driven evolution and molecular basis of multidrug resistance in field populations of the grey mould fungus *Botrytis cinerea*. *PLoS One* 5.
39. Schoonbeek H, Sorbo GD, Waard MAD (2001) The ABC transporter BcatrB affects the sensitivity of *Botrytis cinerea* to the phytoalexin resveratrol and the fungicide fenpiclonil. *Molecular Plant-Microbe Interactions* 14: 562–571.
40. Stefanato FL, Abou-Mansour E, Buchala A, Kretschmer M, Mosbach A, et al. (2009) The ABC transporter BcatrB from *Botrytis cinerea* exports camalexin and is a virulence factor on *Arabidopsis thaliana*. *The Plant Journal* 58: 499–510.
41. Vermeulen T, Schoonbeek H, Waard MAD (2001) The ABC transporter BcatrB from *Botrytis cinerea* is a determinant of the activity of the phenylpyrrole fungicide fludioxonil. *Pest Management Science* 57: 393–402.
42. Detweiler AR, Vargas JM Jr, Danneberger TK (1983) Resistance of *Sclerotinia homoeocarpa* to iprodione and benomyl. *Plant Disease* 67: 627–630.
43. Golembiewski RC, Vargas JM Jr, Jones AL, Detweiler AR (1995) Detection of demethylation inhibitor (DMI) resistance in *Sclerotinia homoeocarpa* populations. *Plant Disease* 79: 491–493.
44. Bonos SA (2006) Heritability of Dollar Spot resistance in creeping bentgrass. *Phytopathology* 96: 808–812.
45. Guo Z, Bonos S, Meyer WA, Day PR, Belanger FC (2003) Transgenic creeping bentgrass with delayed dollar spot symptoms. *Molecular Breeding* 11: 95–101.
46. Davidson RM, Reeves PA, Manosalva PM, Leach JE (2009) Germins: A diverse protein family important for crop improvement. *Plant Science* 177: 499–510.
47. DaRoche AB, Hammerschmidt R (2004) Increase in oxalate oxidase activity in bentgrass response to *Sclerotinia homoeocarpa* and chemical treatment. *Phytopathology* 94 S: 157.
48. Chipps TJ, Gilmore B, Myers JR, Stotz HU (2005) Relationship between oxalate, oxalate oxidase activity, oxalate sensitivity, and white mold susceptibility in *Phaseolus coccineus*. *Phytopathology* 95: 292–299.
49. Venu RC, Beaulieu RA, Graham TL, Medina AM, Boehm MJ (2009) Dollar spot fungus *Sclerotinia homoeocarpa* produces oxalic acid. *International Turfgrass Journal* 11: 263–270.
50. Lu G (2003) Engineering *Sclerotinia sclerotiorum* resistance in oilseed crops. *African Journal of Biotechnology* 2: 509–516.
51. Hu X (2003) Overexpression of a gene encoding hydrogen peroxide-generating oxalate oxidase evokes defense responses in sunflower. *Plant Physiology* 133: 170–181.
52. Walz A, Zingen-Sell I, Loeffler M, Sauer M (2008) Expression of an oxalate oxidase gene in tomato and severity of disease caused by *Botrytis cinerea* and *Sclerotinia sclerotiorum*. *Plant Pathology* 57.
53. Wojtaszek P (1997) Oxidative burst: an early plant response to pathogen infection. *Biochem J* 322: 681–692.
54. Zhou T, Boland GJ (1999) Mycelial growth and production of oxalic acid by virulent and hypovirulent isolates of *Sclerotinia sclerotiorum*. *Canadian Journal of Plant Pathology* 21: 93–99.
55. Sabot F, Simon D, Bernard M (2004) Plant transposable elements, with an emphasis on grass species. *Euphytica* 139: 227–247.
56. Rotter D, Bharti AK, Li HM, Luo C, Bonos SA, et al. (2007) Analysis of EST sequences suggests recent origin of allotetraploid colonial and creeping bentgrasses. *Molecular Genetics and Genomics* 278: 197–209.
57. Kejnovsky E, Hawkins J, Feschotte C (2012) Plant Transposable Elements: Biology and Evolution. In: Wendel JF, Greilhuber J, Dolezel J, Leitch IJ, editors. *Plant Genome Diversity*. Wien: Springer-Verlag 18–19.
58. Daboussi M-J, Capy P (2003) Transposable elements in filamentous fungi. *Annual Review of Microbiology* 57: 275–299.
59. Grandbastion M-A (1998) Activation of plant retrotransposons under stress conditions. *Trends in Plant Science* 3: 181–187.
60. Li H, Ruan J, Durbin R (2008) Mapping short DNA sequencing reads and calling variants using mapping quality scores. *Genome Res* 18: 1851–1858.
61. Auer PL, Doerge RW (2010) Statistical design and analysis of RNA sequencing data. *Genetics* 185: 405–416.
62. Pfaffl MW, Horgan GW, Dempfle L (2002) Relative expression software tool for group-wise comparison and statistical analysis of relative expression results in real time PCR. *Nucleic Acids Research* 30: e36.
