# Supplementary material for: RNA-Seq Analysis of the Sclerotinia homoeocarpa – Creeping Bentgrass Pathosystem
Source: PLoS One. 2012 Aug 8;7(8):e41150. doi: 10.1371/journal.pone.0041150 (PMC3414504; doi:10.1371/journal.pone.0041150)
Supplement: Table S2 — A complete list of Agrostis stolonifera transcripts that are over or under represented at 96 h post inoculation with Sclerotinia homoeocapra. (XLSX) [file pone.0041150.s002.xlsx]

## Sheet: Sheet1
Transcript ID	Blastx Description	log Fold Change	P-value	Expression
AST_875	actin	9.97676	2.35891e-267	Up-regulated
AST_844	peptidase s8 and s53 subtilisin kexin sedolisin	9.64491	8.94601e-205	Up-regulated
AST_1484	---NA---	9.54182	5.26255e-286	Up-regulated
AST_11241	---NA---	9.41337	0	Up-regulated
AST_1113	pathogenesis associated protein pep2	9.12322	3.29947e-182	Up-regulated
AST_12465	---NA---	9.10886	1.17629e-304	Up-regulated
AST_1164	---NA---	8.74577	0	Up-regulated
AST_656	indole-3-acetate beta-glucosyltransferase	8.72762	0	Up-regulated
AST_2474	retrotransposon ty3-gypsy subclass	8.60455	6.1033e-160	Up-regulated
AST_3986	---NA---	8.47995	0	Up-regulated
AST_8712	---NA---	8.465	0	Up-regulated
AST_2535	---NA---	8.24073	0	Up-regulated
AST_6517	---NA---	8.10886	1.54338e-126	Up-regulated
AST_6689	---NA---	8.08706	2.6507e-249	Up-regulated
AST_4195	retrotransposon ty3-gypsy subclass	7.9728	8.79551e-109	Up-regulated
AST_10302	cathepsin l	7.87439	6.44447e-120	Up-regulated
AST_6423	mitochondrial chaperone bcs1	7.82256	1.14941e-103	Up-regulated
AST_1132	---NA---	7.78693	7.18039e-74	Up-regulated
AST_106	mdr-like abc transporter	7.68901	1.14831e-72	Up-regulated
AST_1571	retrotransposon unclassified	7.65483	2.19541e-78	Up-regulated
AST_2577	---NA---	7.5094	2.24525e-75	Up-regulated
AST_8203	---NA---	7.5094	2.05304e-87	Up-regulated
AST_647	indole-3-acetate beta-glucosyltransferase	7.48737	1.24636e-156	Up-regulated
AST_4592	protein	7.48737	1.09785e-78	Up-regulated
AST_12632	---NA---	7.465	0	Up-regulated
AST_8066	---NA---	7.44228	3.35708e-83	Up-regulated
AST_1277	predicted protein [Hordeum vulgare subsp. vulgare]	7.37189	0	Up-regulated
AST_32	rna polymerase alpha subunit	7.33537	0	Up-regulated
AST_18035	---NA---	7.32298	1.2265e-261	Up-regulated
AST_654	indole-3-acetate beta-glucosyltransferase	7.22522	3.73917e-164	Up-regulated
AST_15178	---NA---	7.21989	9.90917e-190	Up-regulated
AST_15306	beige-related and wd-40 repeat-containing protein	7.13743	1.00408e-90	Up-regulated
AST_13155	---NA---	7.10886	5.48994e-79	Up-regulated
AST_18288	---NA---	7.07971	1.34604e-113	Up-regulated
AST_1136	---NA---	7.00416	1.12213e-171	Up-regulated
AST_20228	---NA---	6.98857	2.41459e-128	Up-regulated
AST_2426	predicted protein [Hordeum vulgare subsp. vulgare]	6.94254	0	Up-regulated
AST_12598	---NA---	6.82256	2.45743e-63	Up-regulated
AST_5921	---NA---	6.81668	0	Up-regulated
AST_8449	---NA---	6.75692	0	Up-regulated
AST_105	mdr-like abc transporter	6.75041	2.62527e-85	Up-regulated
AST_246	elongation factor 2	6.68094	8.58482e-81	Up-regulated
AST_1167	hypothetical protein MELLADRAFT_90623 [Melampsora larici-populina 98AG31]	6.6614	1.43751e-104	Up-regulated
AST_104	mdr-like abc transporter	6.63893	1.02667e-87	Up-regulated
AST_17609	---NA---	6.61475	6.36663e-154	Up-regulated
AST_14226	transducin family protein	6.59429	3.21553e-58	Up-regulated
AST_13127	---NA---	6.56934	5.78997e-271	Up-regulated
AST_5887	---NA---	6.5279	0	Up-regulated
AST_14777	---NA---	6.5094	1.02848e-56	Up-regulated
AST_2589	retrotransposon ty3-gypsy subclass	6.5094	4.72023e-38	Up-regulated
AST_15899	---NA---	6.465	1.00534e-59	Up-regulated
AST_681	---NA---	6.465	2.71341e-20	Up-regulated
AST_110	mdr-like abc transporter	6.4192	5.61453e-76	Up-regulated
AST_20234	---NA---	6.4192	8.20979e-87	Up-regulated
AST_2393	---NA---	6.4192	8.99066e-106	Up-regulated
AST_19890	---NA---	6.4192	2.09933e-84	Up-regulated
AST_103	mdr-like abc transporter	6.38495	4.29298e-81	Up-regulated
AST_18181	---NA---	6.32298	1.20133e-66	Up-regulated
AST_3020	---NA---	6.32298	7.72727e-34	Up-regulated
AST_2525	---NA---	6.32298	1.54537e-33	Up-regulated
AST_13328	leucine rich repeat-containing	6.27236	5.63576e-45	Up-regulated
AST_18400	---NA---	6.25508	0	Up-regulated
AST_11778	uncharacterized protein	6.21989	9.22456e-41	Up-regulated
AST_8487	uncharacterized protein	6.21989	1.51001e-36	Up-regulated
AST_6825	---NA---	6.21989	9.66071e-35	Up-regulated
AST_608	germin a	6.21421	0	Up-regulated
AST_13250	---NA---	6.16544	1.1533e-41	Up-regulated
AST_2615	larval serum protein 1 alpha	6.16544	3.16311e-30	Up-regulated
AST_18135	---NA---	6.10886	2.57169e-57	Up-regulated
AST_7358	---NA---	6.10886	1.23609e-32	Up-regulated
AST_1655	---NA---	6.10886	1.61883e-27	Up-regulated
AST_590	germin a	6.06492	1.37579e-110	Up-regulated
AST_5655	hypothetical protein LOC_Os11g01460 [Oryza sativa Japonica Group]	6.04997	3.16311e-30	Up-regulated
AST_7802	---NA---	6.04997	9.8872e-32	Up-regulated
AST_635	---NA---	5.98857	1.92076e-96	Up-regulated
AST_2318	---NA---	5.92444	2.07147e-25	Up-regulated
AST_109	mdr-like abc transporter	5.90082	1.79554e-74	Up-regulated
AST_14247	---NA---	5.85732	2.41545e-35	Up-regulated
AST_15423	---NA---	5.85732	4.72023e-38	Up-regulated
AST_16241	---NA---	5.85732	1.84479e-40	Up-regulated
AST_12509	---NA---	5.85732	1.23609e-32	Up-regulated
AST_8133	---NA---	5.85732	4.04743e-28	Up-regulated
AST_589	germin a	5.82841	1.10809e-140	Up-regulated
AST_16933	---NA---	5.82256	3.35708e-83	Up-regulated
AST_230	retrotransposon ty1-copia subclass	5.82256	2.02381e-28	Up-regulated
AST_5885	---NA---	5.82256	2.6918e-51	Up-regulated
AST_10289	rna-directed dna polymerase (reverse transcriptase)	5.78693	1.01195e-28	Up-regulated
AST_1187	cytochrome b6 f complex subunit iv	5.78693	5.9014e-39	Up-regulated
AST_1790	athila retroelement orf1 protein	5.78693	2.12037e-22	Up-regulated
AST_8933	---NA---	5.78693	1.61883e-27	Up-regulated
AST_2940	---NA---	5.78693	1.17449e-69	Up-regulated
AST_9325	hypothetical protein PTSG_00510 [Salpingoeca sp. ATCC 50818]	5.78693	8.09449e-28	Up-regulated
AST_15509	---NA---	5.76878	4.33659e-143	Up-regulated
AST_16227	major facilitator superfamily protein	5.72804	2.06467e-183	Up-regulated
AST_6713	cytochrome oxidase subunit i	5.71293	1.65698e-24	Up-regulated
AST_10464	---NA---	5.71293	1.61883e-27	Up-regulated
AST_9869	---NA---	5.67446	6.73065e-52	Up-regulated
AST_19300	---NA---	5.63493	8.80985e-47	Up-regulated
AST_17570	---NA---	5.63493	2.95089e-39	Up-regulated
AST_4050	---NA---	5.63493	8.48086e-22	Up-regulated
AST_6142	y3123_orysj ame: full=b3 domain-containing protein os03g0212300	5.63493	5.30131e-23	Up-regulated
AST_4351	nac domain-containing protein 78	5.63493	4.24058e-22	Up-regulated
AST_8904	---NA---	5.63493	8.28522e-25	Up-regulated
AST_3203	---NA---	5.63493	1.69611e-21	Up-regulated
AST_432	---NA---	5.62028	2.51096e-91	Up-regulated
AST_2914	---NA---	5.58048	8.0604e-121	Up-regulated
AST_1677	---NA---	5.55247	8.68156e-19	Up-regulated
AST_3410	predicted protein [Hordeum vulgare subsp. vulgare]	5.55247	2.71341e-20	Up-regulated
AST_1509	protein	5.55247	2.19967e-109	Up-regulated
AST_16682	---NA---	5.55247	3.86385e-34	Up-regulated
AST_16098	---NA---	5.55247	2.47206e-32	Up-regulated
AST_3452	---NA---	5.55247	2.71341e-20	Up-regulated
AST_8976	protein	5.55247	1.32543e-23	Up-regulated
AST_1669	---NA---	5.55247	8.68156e-19	Up-regulated
AST_498	---NA---	5.55247	3.72605e-09	Up-regulated
AST_453	cytochrome p450	5.52245	0	Up-regulated
AST_1535	---NA---	5.5094	6.03934e-36	Up-regulated
AST_11073	---NA---	5.465	1.32543e-23	Up-regulated
AST_6560	---NA---	5.465	1.35675e-20	Up-regulated
AST_7085	conserved domain protein	5.465	6.78399e-21	Up-regulated
AST_10125	glutaminyl-trna synthetase	5.465	5.30131e-23	Up-regulated
AST_11529	serine threonine-protein kinase wnk6	5.465	3.31382e-24	Up-regulated
AST_9602	---NA---	5.465	1.12707e-44	Up-regulated
AST_8618	---NA---	5.4499	4.82815e-128	Up-regulated
AST_584	---NA---	5.37189	7.45199e-09	Up-regulated
AST_13490	---NA---	5.37189	1.65698e-24	Up-regulated
AST_9108	---NA---	5.37189	6.78399e-21	Up-regulated
AST_7273	rna-directed dna polymerase (reverse transcriptase)	5.37189	5.42665e-20	Up-regulated
AST_10991	---NA---	5.37189	4.24058e-22	Up-regulated
AST_17335	---NA---	5.37189	4.94386e-32	Up-regulated
AST_3480	---NA---	5.37189	3.47242e-18	Up-regulated
AST_11709	---NA---	5.37189	1.06022e-22	Up-regulated
AST_2760	---NA---	5.33947	7.34875e-102	Up-regulated
AST_10252	---NA---	5.3329	0	Up-regulated
AST_725	germin a	5.3329	2.2028e-47	Up-regulated
AST_15897	---NA---	5.313	2.31275e-134	Up-regulated
AST_16984	ribulose- -bisphosphate carboxylase oxygenase large subunit	5.29789	1.31699e-116	Up-regulated
AST_2875	retrotransposon protein	5.27236	1.11102e-16	Up-regulated
AST_17066	---NA---	5.27236	2.53012e-29	Up-regulated
AST_16722	retrotransposon protein	5.27236	2.02381e-28	Up-regulated
AST_1892	---NA---	5.27236	4.44384e-16	Up-regulated
AST_1755	---NA---	5.27236	3.95448e-31	Up-regulated
AST_682	syntaxin-related protein nt-syr1	5.27236	3.72605e-09	Up-regulated
AST_12169	---NA---	5.16544	2.01048e-59	Up-regulated
AST_1172	serine threonine protein kinase stpk-v	5.16544	9.09868e-13	Up-regulated
AST_14488	---NA---	5.16544	2.12037e-22	Up-regulated
AST_8672	---NA---	5.16544	6.94463e-18	Up-regulated
AST_739	---NA---	5.16544	7.45199e-09	Up-regulated
AST_998	transposon en spm sub-class	5.16544	4.24058e-22	Up-regulated
AST_14858	---NA---	5.16544	5.30131e-23	Up-regulated
AST_16401	---NA---	5.16544	1.03578e-25	Up-regulated
AST_16177	---NA---	5.16544	4.14278e-25	Up-regulated
AST_1079	---NA---	5.16544	7.27852e-12	Up-regulated
AST_18109	---NA---	5.16544	6.3259e-30	Up-regulated
AST_19431	---NA---	5.1141	0	Up-regulated
AST_854	germin a	5.11061	3.89807e-297	Up-regulated
AST_19947	ribulose- -bisphosphate carboxylase oxygenase large subunit	5.10886	4.52623e-137	Up-regulated
AST_6665	---NA---	5.09727	2.74533e-79	Up-regulated
AST_2502	protein	5.04997	2.84364e-14	Up-regulated
AST_8835	---NA---	5.04997	1.11102e-16	Up-regulated
AST_14824	---NA---	5.04997	3.39211e-21	Up-regulated
AST_3447	retrotransposon unclassified	5.04997	1.42185e-14	Up-regulated
AST_10649	---NA---	5.04997	4.83063e-35	Up-regulated
AST_2325	---NA---	5.04997	8.09449e-28	Up-regulated
AST_18018	phosphoribosylformylglycinamidine synthase	5.04997	1.61883e-27	Up-regulated
AST_655	---NA---	5.04997	3.29376e-117	Up-regulated
AST_1293	---NA---	5.04997	9.09868e-13	Up-regulated
AST_4793	germin a	5.04997	1.26512e-29	Up-regulated
AST_4549	---NA---	5.04997	7.10944e-15	Up-regulated
AST_2176	---NA---	5.04997	5.68716e-14	Up-regulated
AST_19355	---NA---	5.00106	5.99542e-302	Up-regulated
AST_10756	---NA---	4.98857	1.54537e-33	Up-regulated
AST_1786	---NA---	4.97597	4.91434e-63	Up-regulated
AST_16687	---NA---	4.92444	2.12037e-22	Up-regulated
AST_10346	reverse transcriptase	4.92444	4.44384e-16	Up-regulated
AST_14440	---NA---	4.92444	4.34091e-19	Up-regulated
AST_12393	kelch motif family protein	4.92444	2.7777e-17	Up-regulated
AST_14025	---NA---	4.92444	1.73626e-18	Up-regulated
AST_7064	hypothetical protein SORBIDRAFT_10g021935 [Sorghum bicolor]	4.92444	1.42185e-14	Up-regulated
AST_15261	---NA---	4.92444	5.42665e-20	Up-regulated
AST_18224	---NA---	4.92444	5.17911e-26	Up-regulated
AST_1774	gag-pol polyprotein	4.92444	1.8197e-12	Up-regulated
AST_138	---NA---	4.92444	3.5548e-15	Up-regulated
AST_5050	transposon en spm sub-class	4.92444	5.68716e-14	Up-regulated
AST_10433	---NA---	4.92444	4.44384e-16	Up-regulated
AST_1050	gag-pol polyprotein	4.92444	4.65777e-10	Up-regulated
AST_5813	---NA---	4.88004	3.05246e-160	Up-regulated
AST_1026	ubiquitin	4.85732	8.02906e-90	Up-regulated
AST_11444	ferredoxin 2	4.85732	1.97734e-31	Up-regulated
AST_11489	ribulose- -bisphosphate carboxylase oxygenase large subunit	4.83424	3.14012e-92	Up-regulated
AST_1670	transposon en spm sub-class	4.83424	3.86385e-34	Up-regulated
AST_3389	---NA---	4.82256	6.88648e-49	Up-regulated
AST_2480	transposon en spm sub-class	4.78693	7.27852e-12	Up-regulated
AST_1027	ubiquitin	4.78693	2.45587e-94	Up-regulated
AST_8360	hypothetical protein OsI_27244 [Oryza sativa Indica Group]	4.78693	1.13741e-13	Up-regulated
AST_1835	protein	4.78693	1.45568e-11	Up-regulated
AST_16252	---NA---	4.78693	1.0853e-19	Up-regulated
AST_896	---NA---	4.78693	5.96136e-08	Up-regulated
AST_13635	---NA---	4.78693	1.11102e-16	Up-regulated
AST_19204	---NA---	4.78693	5.17911e-26	Up-regulated
AST_17578	anther ethylene-upregulated protein expressed	4.78693	4.24058e-22	Up-regulated
AST_2053	---NA---	4.78693	1.45568e-11	Up-regulated
AST_5832	---NA---	4.78693	4.54943e-13	Up-regulated
AST_14395	---NA---	4.78693	1.4695e-101	Up-regulated
AST_9220	---NA---	4.78693	2.84364e-14	Up-regulated
AST_4462	---NA---	4.78693	1.8197e-12	Up-regulated
AST_8185	protein	4.78693	1.13741e-13	Up-regulated
AST_2823	valyl trna synthetase	4.78693	3.63933e-12	Up-regulated
AST_1950	cellobiohydrolase ii	4.78693	1.45568e-11	Up-regulated
AST_716	germin a	4.76617	1.12707e-44	Up-regulated
AST_1134	pdr-like abc transporter	4.73349	7.51266e-99	Up-regulated
AST_8949	---NA---	4.71293	2.58967e-26	Up-regulated
AST_16728	---NA---	4.6874	1.02848e-56	Up-regulated
AST_2791	---NA---	4.66664	1.05221e-53	Up-regulated
AST_6849	aldo keto	4.66035	0	Up-regulated
AST_9348	---NA---	4.65765	6.01755e-265	Up-regulated
AST_143	atp-binding cassette	4.64799	0	Up-regulated
AST_3982	---NA---	4.64558	2.98891e-163	Up-regulated
AST_2349	---NA---	4.63493	1.16448e-10	Up-regulated
AST_17685	gag-pol polyprotein	4.63493	2.71341e-20	Up-regulated
AST_3357	---NA---	4.63493	5.8225e-11	Up-regulated
AST_3801	mutator-like transposase	4.63493	2.9113e-11	Up-regulated
AST_12626	---NA---	4.63493	2.84364e-14	Up-regulated
AST_5231	methionyl-trna synthetase	4.63493	1.45568e-11	Up-regulated
AST_3075	---NA---	4.63493	5.8225e-11	Up-regulated
AST_11738	---NA---	4.63493	5.68716e-14	Up-regulated
AST_2950	octicosapeptide phox domain-containing protein	4.63493	5.8225e-11	Up-regulated
AST_3026	---NA---	4.63493	5.8225e-11	Up-regulated
AST_7608	---NA---	4.63493	3.63933e-12	Up-regulated
AST_15160	proteolysis 6	4.63493	2.22198e-16	Up-regulated
AST_13304	ribulose- -bisphosphate carboxylase oxygenase large subunit	4.63493	7.10944e-15	Up-regulated
AST_7392	---NA---	4.63493	3.63933e-12	Up-regulated
AST_12611	binding protein	4.63493	2.84364e-14	Up-regulated
AST_11091	calcium-dependent protein kinase	4.63493	2.74533e-79	Up-regulated
AST_141	atp-binding cassette	4.60141	0	Up-regulated
AST_1377	---NA---	4.57543	1.17501e-100	Up-regulated
AST_18770	---NA---	4.55247	2.88365e-42	Up-regulated
AST_480	atpase subunit 1	4.55247	7.45199e-09	Up-regulated
AST_1394	---NA---	4.54301	8.58482e-81	Up-regulated
AST_4234	germin a	4.4849	1.28389e-88	Up-regulated
AST_14062	kinase family protein	4.465	1.13741e-13	Up-regulated
AST_17975	---NA---	4.465	1.73626e-18	Up-regulated
AST_13384	anthranilate synthase alpha 2 subunit	4.465	2.27476e-13	Up-regulated
AST_11395	---NA---	4.465	3.63933e-12	Up-regulated
AST_11201	protein	4.465	3.63933e-12	Up-regulated
AST_4342	---NA---	4.465	1.0853e-19	Up-regulated
AST_19857	---NA---	4.465	2.12037e-22	Up-regulated
AST_13221	serine carboxypeptidase family expressed	4.465	4.54943e-13	Up-regulated
AST_6302	rust resistance kinase lr10	4.465	1.16448e-10	Up-regulated
AST_18067	---NA---	4.465	8.68156e-19	Up-regulated
AST_5357	---NA---	4.465	2.71341e-20	Up-regulated
AST_6386	---NA---	4.465	6.78399e-21	Up-regulated
AST_2185	---NA---	4.465	1.86305e-09	Up-regulated
AST_2195	---NA---	4.465	1.86305e-09	Up-regulated
AST_7427	protein	4.465	5.8225e-11	Up-regulated
AST_4950	dek domain-containing chromatin associated protein	4.465	2.32892e-10	Up-regulated
AST_9842	---NA---	4.465	1.45568e-11	Up-regulated
AST_10864	---NA---	4.465	3.63933e-12	Up-regulated
AST_4177	---NA---	4.465	4.65777e-10	Up-regulated
AST_6811	eukaryotic initiation factor 4a	4.42436	2.00786e-90	Up-regulated
AST_1192	---NA---	4.40488	0	Up-regulated
AST_7584	---NA---	4.37189	5.42665e-20	Up-regulated
AST_12202	---NA---	4.37189	2.65075e-23	Up-regulated
AST_2131	---NA---	4.37189	2.7777e-17	Up-regulated
AST_533	---NA---	4.37189	2.98072e-08	Up-regulated
AST_3192	ac069158_10 gata-1 zinc finger protein	4.3015	2.01048e-59	Up-regulated
AST_9123	---NA---	4.27236	4.65777e-10	Up-regulated
AST_13775	---NA---	4.27236	7.27852e-12	Up-regulated
AST_3954	---NA---	4.27236	7.45199e-09	Up-regulated
AST_11209	---NA---	4.27236	1.97734e-31	Up-regulated
AST_3528	endonuclease exonuclease phosphatase	4.27236	7.45199e-09	Up-regulated
AST_8505	snare-interacting protein keule	4.27236	9.31539e-10	Up-regulated
AST_1171	---NA---	4.27236	4.76892e-07	Up-regulated
AST_5969	retrotransposon unclassified	4.27236	3.72605e-09	Up-regulated
AST_3399	acid phosphatase	4.27236	7.45199e-09	Up-regulated
AST_3437	---NA---	4.27236	7.45199e-09	Up-regulated
AST_19548	---NA---	4.27236	4.34091e-19	Up-regulated
AST_1189	aldehyde dehydrogenase	4.27236	2.38449e-07	Up-regulated
AST_16420	---NA---	4.27236	5.68716e-14	Up-regulated
AST_11879	---NA---	4.27236	5.8225e-11	Up-regulated
AST_6194	ribosomal pseudouridine	4.27236	1.86305e-09	Up-regulated
AST_4602	copia-type pol polyprotein	4.27236	7.45199e-09	Up-regulated
AST_8812	vacuolar sorting protein 39	4.27236	4.65777e-10	Up-regulated
AST_3344	gag-pol polyprotein	4.27236	7.45199e-09	Up-regulated
AST_1344	---NA---	4.27236	5.96136e-08	Up-regulated
AST_12694	---NA---	4.27236	2.12037e-22	Up-regulated
AST_11808	---NA---	4.27236	5.8225e-11	Up-regulated
AST_1978	---NA---	4.27236	2.98072e-08	Up-regulated
AST_16099	---NA---	4.27236	1.13741e-13	Up-regulated
AST_358	transposon en spm sub-class	4.27236	1.90753e-06	Up-regulated
AST_17227	---NA---	4.27236	7.18039e-74	Up-regulated
AST_4046	retrotransposon unclassified	4.27236	7.45199e-09	Up-regulated
AST_17443	---NA---	4.27236	1.77745e-15	Up-regulated
AST_17450	uncharacterized protein	4.27236	1.77745e-15	Up-regulated
AST_9596	---NA---	4.27236	4.65777e-10	Up-regulated
AST_9039	---NA---	4.27236	1.0853e-19	Up-regulated
AST_10828	---NA---	4.27236	1.16448e-10	Up-regulated
AST_4591	---NA---	4.27236	7.45199e-09	Up-regulated
AST_2948	urease	4.27236	1.49038e-08	Up-regulated
AST_18030	---NA---	4.27236	2.22198e-16	Up-regulated
AST_5075	---NA---	4.27236	3.72605e-09	Up-regulated
AST_1163	mrp-like abc transporter	4.27236	4.76892e-07	Up-regulated
AST_3044	---NA---	4.27236	1.49038e-08	Up-regulated
AST_8152	v-type proton atpase subunit b2	4.27236	9.31539e-10	Up-regulated
AST_3650	---NA---	4.27236	7.45199e-09	Up-regulated
AST_11838	pentatricopeptide repeat-containing	4.27236	2.10424e-53	Up-regulated
AST_17061	---NA---	4.27236	7.10944e-15	Up-regulated
AST_2652	---NA---	4.27236	1.49038e-08	Up-regulated
AST_1233	---NA---	4.27236	2.38449e-07	Up-regulated
AST_18986	---NA---	4.27236	1.2078e-35	Up-regulated
AST_3508	---NA---	4.27236	7.45199e-09	Up-regulated
AST_3518	---NA---	4.27236	7.45199e-09	Up-regulated
AST_992	transposon en spm sub-class	4.23256	5.11388e-117	Up-regulated
AST_6928	germin a	4.22533	0	Up-regulated
AST_1666	---NA---	4.20197	2.12037e-22	Up-regulated
AST_16277	---NA---	4.20197	1.93271e-37	Up-regulated
AST_14384	---NA---	4.19292	3.02138e-88	Up-regulated
AST_1386	major facilitator superfamily expressed	4.16544	2.84364e-14	Up-regulated
AST_9405	photosystem ii 32 kda protein	4.16544	1.73626e-18	Up-regulated
AST_764	germin a	4.1345	2.30092e-234	Up-regulated
AST_11721	phospholipid-translocating atpase	4.12797	2.45398e-27	Up-regulated
AST_17182	---NA---	4.08744	1.08254e-229	Up-regulated
AST_4620	retrotransposon ty1-copia subclass	4.04997	1.19226e-07	Up-regulated
AST_8005	ornithine aminotransferase	4.04997	1.49038e-08	Up-regulated
AST_8086	serine carboxypeptidase	4.04997	1.49038e-08	Up-regulated
AST_9155	ribulose- -bisphosphate carboxylase oxygenase large subunit	4.04997	7.45199e-09	Up-regulated
AST_18290	---NA---	4.04997	4.85714e-27	Up-regulated
AST_10306	trafficking protein particle complex subunit 4	4.04997	3.72605e-09	Up-regulated
AST_7013	---NA---	4.04997	2.98072e-08	Up-regulated
AST_7062	retrotransposon unclassified	4.04997	2.98072e-08	Up-regulated
AST_10041	gag-pol polyprotein	4.04997	7.45199e-09	Up-regulated
AST_11942	---NA---	4.04997	1.86305e-09	Up-regulated
AST_16144	---NA---	4.04997	7.27852e-12	Up-regulated
AST_4379	atp synthase cf0 subunit i	4.04997	1.19226e-07	Up-regulated
AST_7956	e3 ufm1-protein ligase 1-like protein	4.04997	1.49038e-08	Up-regulated
AST_17611	---NA---	4.04997	1.13741e-13	Up-regulated
AST_1479	protein	4.04997	4.76892e-07	Up-regulated
AST_8445	---NA---	4.04997	1.49038e-08	Up-regulated
AST_17082	---NA---	4.04997	9.09868e-13	Up-regulated
AST_9731	---NA---	4.04997	7.45199e-09	Up-regulated
AST_17120	---NA---	4.04997	4.54943e-13	Up-regulated
AST_8564	---NA---	4.04997	1.49038e-08	Up-regulated
AST_6457	ribophorin ii family protein	4.04997	2.98072e-08	Up-regulated
AST_15684	---NA---	4.04997	1.45568e-11	Up-regulated
AST_2142	---NA---	4.04997	2.38449e-07	Up-regulated
AST_2162	---NA---	4.04997	2.38449e-07	Up-regulated
AST_1531	rna-dependent rna polymerase	4.04997	4.76892e-07	Up-regulated
AST_13638	---NA---	4.04997	2.32892e-10	Up-regulated
AST_15392	---NA---	4.04997	2.9113e-11	Up-regulated
AST_3306	---NA---	4.04997	1.19226e-07	Up-regulated
AST_19116	---NA---	4.04997	2.35512e-14	Up-regulated
AST_15356	---NA---	4.04997	2.9113e-11	Up-regulated
AST_7316	---NA---	4.04997	2.98072e-08	Up-regulated
AST_1410	retrotransposon unclassified	4.04997	9.53774e-07	Up-regulated
AST_17702	---NA---	4.04997	1.13741e-13	Up-regulated
AST_2661	citrate synthase	4.04997	2.38449e-07	Up-regulated
AST_2225	retrotransposon ty1-copia subclass	4.04997	2.37432e-19	Up-regulated
AST_14638	hypothetical protein OsJ_36354 [Oryza sativa Japonica Group]	4.04997	1.16448e-10	Up-regulated
AST_14653	gag-pol polyprotein	4.04997	1.16448e-10	Up-regulated
AST_1674	---NA---	4.04997	1.13741e-13	Up-regulated
AST_12593	---NA---	4.04997	9.31539e-10	Up-regulated
AST_8260	---NA---	4.04997	3.11077e-15	Up-regulated
AST_4419	retrotransposon ty3-gypsy subclass	4.04997	1.19226e-07	Up-regulated
AST_10962	---NA---	4.04997	3.72605e-09	Up-regulated
AST_18606	---NA---	4.04997	9.06453e-14	Up-regulated
AST_9190	---NA---	4.04997	7.45199e-09	Up-regulated
AST_4006	---NA---	4.04997	1.19226e-07	Up-regulated
AST_17268	---NA---	4.04997	4.54943e-13	Up-regulated
AST_1544	---NA---	4.04997	4.76892e-07	Up-regulated
AST_2434	pre-rrna processing protein rrp5	4.04997	2.38449e-07	Up-regulated
AST_2438	---NA---	4.04997	2.38449e-07	Up-regulated
AST_1613	retrotransposon unclassified	4.04997	4.76892e-07	Up-regulated
AST_4924	---NA---	4.04997	5.96136e-08	Up-regulated
AST_13430	f-box domain containing protein	4.04997	4.65777e-10	Up-regulated
AST_13466	---NA---	4.04997	4.65777e-10	Up-regulated
AST_13951	---NA---	4.04997	2.32892e-10	Up-regulated
AST_2608	---NA---	4.04997	2.38449e-07	Up-regulated
AST_8958	---NA---	4.04997	1.49038e-08	Up-regulated
AST_5836	sulfate transporter	4.04997	5.96136e-08	Up-regulated
AST_5883	retrotransposon ty1-copia subclass	4.04997	5.96136e-08	Up-regulated
AST_2701	---NA---	4.04997	2.38449e-07	Up-regulated
AST_3455	chromatin-remodeling protein 11	4.04997	1.19226e-07	Up-regulated
AST_12131	nbs-lrr type disease resistance protein rpg1-b	4.04997	9.31539e-10	Up-regulated
AST_6961	mitochondrial phosphate transporter	4.04997	2.98072e-08	Up-regulated
AST_3147	af403128_1s-locus receptor-like kinase rlk11	4.04997	1.19226e-07	Up-regulated
AST_4260	---NA---	4.00106	2.15597e-32	Up-regulated
AST_6064	sec61 alpha form 2	3.98624	7.48804e-180	Up-regulated
AST_768	ent-kaurene synthase b	3.97738	0	Up-regulated
AST_11763	pdr-like abc transporter	3.97402	2.6154e-101	Up-regulated
AST_15451	---NA---	3.9728	5.13007e-151	Up-regulated
AST_13038	---NA---	3.9675	7.44627e-26	Up-regulated
AST_3247	---NA---	3.9675	4.68064e-19	Up-regulated
AST_500	---NA---	3.94305	4.68064e-19	Up-regulated
AST_3428	---NA---	3.92444	2.61598e-12	Up-regulated
AST_15983	protein	3.92444	1.20416e-19	Up-regulated
AST_18955	---NA---	3.92444	2.30744e-25	Up-regulated
AST_5235	retrotransposon ty3-gypsy subclass	3.89796	1.02931e-60	Up-regulated
AST_1358	---NA---	3.88004	3.14892e-75	Up-regulated
AST_18911	---NA---	3.88004	3.26626e-72	Up-regulated
AST_10580	---NA---	3.88004	1.04734e-20	Up-regulated
AST_198	elongation factor	3.79333	7.1599e-64	Up-regulated
AST_5753	predicted protein [Hordeum vulgare subsp. vulgare]	3.78693	1.09683e-05	Up-regulated
AST_6622	predicted protein [Hordeum vulgare subsp. vulgare]	3.78693	1.09683e-05	Up-regulated
AST_6633	---NA---	3.78693	1.09683e-05	Up-regulated
AST_1380	conserved protein	3.78693	7.62998e-06	Up-regulated
AST_7923	---NA---	3.78693	5.72265e-06	Up-regulated
AST_2533	---NA---	3.78693	3.81502e-06	Up-regulated
AST_2564	f-box domain containing protein	3.78693	3.81502e-06	Up-regulated
AST_2576	---NA---	3.78693	3.81502e-06	Up-regulated
AST_2847	---NA---	3.78693	1.90753e-06	Up-regulated
AST_11610	hypothetical protein SORBIDRAFT_1758s002010 [Sorghum bicolor]	3.78693	8.04774e-07	Up-regulated
AST_14454	s-receptor kinase	3.78693	1.11778e-07	Up-regulated
AST_8818	ent-kaurene synthase 1	3.78693	2.98058e-06	Up-regulated
AST_8828	retrotransposon unclassified	3.78693	2.98058e-06	Up-regulated
AST_1914	---NA---	3.78693	3.81502e-06	Up-regulated
AST_12325	at2g07360-like protein	3.78693	4.17295e-07	Up-regulated
AST_16517	pwwp domain containing expressed	3.78693	4.07555e-09	Up-regulated
AST_1871	---NA---	3.78693	3.81502e-06	Up-regulated
AST_14838	---NA---	3.78693	5.77529e-08	Up-regulated
AST_12411	---NA---	3.78693	4.17295e-07	Up-regulated
AST_15591	---NA---	3.78693	1.53702e-08	Up-regulated
AST_5376	---NA---	3.78693	1.09683e-05	Up-regulated
AST_13214	---NA---	3.78693	2.16102e-07	Up-regulated
AST_8525	---NA---	3.78693	1.33645e-12	Up-regulated
AST_6445	retrotransposon ty3-gypsy subclass	3.78693	1.09683e-05	Up-regulated
AST_18733	---NA---	3.78693	1.95618e-11	Up-regulated
AST_3270	photosystem ii d2 protein	3.78693	1.90753e-06	Up-regulated
AST_3274	protein	3.78693	1.90753e-06	Up-regulated
AST_3288	phospholipid-translocating atpase	3.78693	1.90753e-06	Up-regulated
AST_18890	---NA---	3.78693	9.68893e-23	Up-regulated
AST_5638	protein	3.78693	1.09683e-05	Up-regulated
AST_3086	---NA---	3.78693	1.90753e-06	Up-regulated
AST_2561	---NA---	3.78693	7.46048e-11	Up-regulated
AST_4626	---NA---	3.78693	1.90753e-06	Up-regulated
AST_4629	retrotransposon ty3-gypsy subclass	3.78693	1.90753e-06	Up-regulated
AST_638	---NA---	3.78693	2.98084e-08	Up-regulated
AST_7848	zn- - containing protein	3.78693	5.72265e-06	Up-regulated
AST_17949	---NA---	3.78693	1.45568e-10	Up-regulated
AST_14903	trna-glutamine synthetase	3.78693	8.10691e-77	Up-regulated
AST_17806	---NA---	3.78693	2.83852e-10	Up-regulated
AST_7097	histone deacetylase hd2	3.78693	5.11811e-12	Up-regulated
AST_1966	---NA---	3.78693	3.81502e-06	Up-regulated
AST_6361	50s ribosomal protein l2	3.78693	1.09683e-05	Up-regulated
AST_13806	---NA---	3.78693	1.11778e-07	Up-regulated
AST_17918	---NA---	3.78693	1.45568e-10	Up-regulated
AST_9086	---NA---	3.78693	2.98058e-06	Up-regulated
AST_14293	---NA---	3.78693	1.11778e-07	Up-regulated
AST_18105	---NA---	3.78693	1.45568e-10	Up-regulated
AST_2391	transducin wd40 domain-containing protein	3.78693	3.81502e-06	Up-regulated
AST_16895	nlp2_orysj ame: full=protein nlp2 short= 2 ame: full=nin-like protein 2 ame: full=nodule inception protein 2	3.78693	2.09603e-09	Up-regulated
AST_9772	---NA---	3.78693	1.54992e-06	Up-regulated
AST_18742	---NA---	3.78693	1.95618e-11	Up-regulated
AST_17870	---NA---	3.78693	1.45568e-10	Up-regulated
AST_2202	---NA---	3.78693	3.81502e-06	Up-regulated
AST_6161	protein	3.78693	1.09683e-05	Up-regulated
AST_9712	---NA---	3.78693	2.98058e-06	Up-regulated
AST_9732	---NA---	3.78693	2.98058e-06	Up-regulated
AST_20496	---NA---	3.78693	1.77732e-13	Up-regulated
AST_1626	atp-binding cassette	3.78693	2.83852e-10	Up-regulated
AST_12917	protein	3.78693	6.11028e-15	Up-regulated
AST_12974	leucine rich protein	3.78693	4.17295e-07	Up-regulated
AST_5503	---NA---	3.78693	1.09683e-05	Up-regulated
AST_14720	---NA---	3.78693	5.77529e-08	Up-regulated
AST_7095	---NA---	3.78693	5.72265e-06	Up-regulated
AST_13098	protein	3.78693	2.16102e-07	Up-regulated
AST_6288	---NA---	3.78693	1.09683e-05	Up-regulated
AST_8483	acyl- oxidase	3.78693	2.98058e-06	Up-regulated
AST_296	cleavage and polyadenylylation specificity factor subunit	3.78693	4.17295e-07	Up-regulated
AST_16956	---NA---	3.78693	2.09603e-09	Up-regulated
AST_8862	---NA---	3.78693	2.98058e-06	Up-regulated
AST_8867	disease resistance protein (cc-nbs-lrr)	3.78693	6.82459e-13	Up-regulated
AST_17406	beta-glucosidase-like protein	3.78693	5.53138e-10	Up-regulated
AST_6905	e3 ubiquitin-protein ligase upl3	3.78693	5.72265e-06	Up-regulated
AST_15065	af474072_3 sapiens nnp-1 nop52 ap001752 (score = 92 e= 9e-18)	3.78693	2.98084e-08	Up-regulated
AST_12841	---NA---	3.78693	4.17295e-07	Up-regulated
AST_3902	integrase	3.78693	1.90753e-06	Up-regulated
AST_18064	alanine aminotransferase	3.78693	1.45568e-10	Up-regulated
AST_7172	---NA---	3.78693	5.72265e-06	Up-regulated
AST_1326	---NA---	3.78693	7.62998e-06	Up-regulated
AST_5552	fggy family of carbohydrate kinase	3.78693	1.09683e-05	Up-regulated
AST_5585	helicase-like protein	3.78693	1.09683e-05	Up-regulated
AST_10923	---NA---	3.78693	1.54992e-06	Up-regulated
AST_4895	---NA---	3.78693	9.53774e-07	Up-regulated
AST_10687	ubiquitin-specific protease 8	3.78693	1.54992e-06	Up-regulated
AST_9510	---NA---	3.78693	2.98058e-06	Up-regulated
AST_8927	---NA---	3.78693	2.98058e-06	Up-regulated
AST_8972	transposon unclassified	3.78693	2.98058e-06	Up-regulated
AST_8982	wall-associated serine threonine kinase	3.78693	2.98058e-06	Up-regulated
AST_17865	---NA---	3.78693	3.98099e-20	Up-regulated
AST_8443	---NA---	3.78693	2.98058e-06	Up-regulated
AST_3869	pdr-like abc transporter	3.78693	2.72725e-63	Up-regulated
AST_2467	---NA---	3.78693	3.81502e-06	Up-regulated
AST_10506	---NA---	3.78693	1.54992e-06	Up-regulated
AST_12586	---NA---	3.78693	4.17295e-07	Up-regulated
AST_2930	cellulose synthase	3.78693	1.90753e-06	Up-regulated
AST_1776	hypothetical protein BACCAP_03832 [Bacteroides capillosus ATCC 29799]	3.78693	3.81502e-06	Up-regulated
AST_2729	acid phosphatase	3.78693	3.81502e-06	Up-regulated
AST_10429	---NA---	3.78693	1.54992e-06	Up-regulated
AST_2136	---NA---	3.78693	3.81502e-06	Up-regulated
AST_1660	---NA---	3.78693	7.62998e-06	Up-regulated
AST_2520	---NA---	3.78693	4.2531e-46	Up-regulated
AST_387	---NA---	3.76046	1.40998e-21	Up-regulated
AST_12039	---NA---	3.75073	0	Up-regulated
AST_18782	---NA---	3.71293	1.60072e-40	Up-regulated
AST_15034	---NA---	3.71293	1.22452e-29	Up-regulated
AST_3555	pdr-like abc transporter	3.71293	3.36809e-77	Up-regulated
AST_18050	---NA---	3.71293	1.37612e-221	Up-regulated
AST_10075	ribulose- -bisphosphate carboxylase oxygenase large subunit	3.6874	1.59199e-17	Up-regulated
AST_1158	tpa_exp: transposase	3.6874	1.33645e-12	Up-regulated
AST_6420	---NA---	3.6874	8.48114e-16	Up-regulated
AST_13	rna polymerase beta subunit	3.67216	1.64236e-15	Up-regulated
AST_2135	---NA---	3.63493	2.09603e-09	Up-regulated
AST_18373	---NA---	3.63493	5.72843e-19	Up-regulated
AST_11520	at1g29900-like protein	3.63493	1.60513e-11	Up-regulated
AST_10323	---NA---	3.63493	5.11811e-12	Up-regulated
AST_15117	---NA---	3.63493	8.55973e-14	Up-regulated
AST_4702	pre-mrna-processing factor 19-2	3.63493	2.83852e-10	Up-regulated
AST_15876	gag-pol polyprotein	3.63493	1.18879e-14	Up-regulated
AST_1051	---NA---	3.63493	8.55973e-14	Up-regulated
AST_13444	---NA---	3.63493	1.17925e-12	Up-regulated
AST_13181	---NA---	3.63493	2.26781e-12	Up-regulated
AST_7165	---NA---	3.63493	7.46048e-11	Up-regulated
AST_1105	germin a	3.63493	2.16102e-07	Up-regulated
AST_10575	---NA---	3.6242	7.41782e-81	Up-regulated
AST_10008	---NA---	3.60251	3.44076e-26	Up-regulated
AST_11877	trna-glutamine synthetase	3.59429	8.16421e-45	Up-regulated
AST_917	transposon en spm sub-class	3.58048	2.09603e-09	Up-regulated
AST_4821	uncharacterized protein	3.58048	4.43551e-14	Up-regulated
AST_494	---NA---	3.58048	5.72265e-06	Up-regulated
AST_10642	---NA---	3.58048	2.28355e-31	Up-regulated
AST_8944	---NA---	3.58048	8.48114e-16	Up-regulated
AST_1567	---NA---	3.57192	2.82577e-50	Up-regulated
AST_1166	---NA---	3.55247	2.29697e-14	Up-regulated
AST_17178	---NA---	3.55247	2.21564e-29	Up-regulated
AST_7201	serine threonine-protein kinase receptor precursor	3.54301	1.4274e-40	Up-regulated
AST_5928	fibrillarin 2	3.51563	3.53908e-89	Up-regulated
AST_80	photosystem ii 47 kda protein	3.49475	5.40028e-09	Up-regulated
AST_8738	poly polymerase catalytic domain containing expressed	3.49248	6.93675e-59	Up-regulated
AST_13501	dna binding nucleic acid binding protein binding zinc ion binding protein	3.465	5.72265e-06	Up-regulated
AST_13508	retrotransposon unclassified	3.465	5.72265e-06	Up-regulated
AST_15456	---NA---	3.465	1.54992e-06	Up-regulated
AST_14641	---NA---	3.465	2.98058e-06	Up-regulated
AST_13209	---NA---	3.465	5.72265e-06	Up-regulated
AST_13000	---NA---	3.465	1.09683e-05	Up-regulated
AST_13010	---NA---	3.465	1.09683e-05	Up-regulated
AST_16022	dna polymerase delta p66 subunit -like	3.465	8.04774e-07	Up-regulated
AST_1243	eukaryotic translation initiation factor 2 beta subunit	3.465	5.77215e-20	Up-regulated
AST_16725	---NA---	3.465	4.43551e-14	Up-regulated
AST_14409	---NA---	3.465	2.98058e-06	Up-regulated
AST_16606	predicted protein [Hordeum vulgare subsp. vulgare]	3.465	2.16102e-07	Up-regulated
AST_16547	---NA---	3.465	2.16102e-07	Up-regulated
AST_12627	---NA---	3.465	1.09683e-05	Up-regulated
AST_12628	protein	3.465	1.09683e-05	Up-regulated
AST_12664	---NA---	3.465	1.09683e-05	Up-regulated
AST_19078	photosystem i assembly protein ycf4	3.465	1.94171e-08	Up-regulated
AST_12231	---NA---	3.465	1.09683e-05	Up-regulated
AST_17263	---NA---	3.465	1.11778e-07	Up-regulated
AST_14028	splicing factor	3.465	5.72265e-06	Up-regulated
AST_18860	retrotransposon ty1-copia subclass	3.465	1.94171e-08	Up-regulated
AST_17513	---NA---	3.465	5.77529e-08	Up-regulated
AST_19490	---NA---	3.465	5.40028e-09	Up-regulated
AST_16934	growth regulator	3.465	1.11778e-07	Up-regulated
AST_13417	---NA---	3.465	5.72265e-06	Up-regulated
AST_7505	---NA---	3.465	1.02473e-08	Up-regulated
AST_10390	rubisco subunit binding-protein beta subunit	3.465	7.84246e-10	Up-regulated
AST_3969	---NA---	3.465	7.91809e-09	Up-regulated
AST_12849	bms1 and nuc121 domain-containing protein	3.465	1.09683e-05	Up-regulated
AST_16766	photosystem ii 32 kda protein	3.465	2.16102e-07	Up-regulated
AST_19444	---NA---	3.465	5.40028e-09	Up-regulated
AST_19464	---NA---	3.465	5.40028e-09	Up-regulated
AST_19469	---NA---	3.465	5.40028e-09	Up-regulated
AST_15128	cytochrome b	3.465	1.54992e-06	Up-regulated
AST_12417	glutamate receptor 2	3.465	1.09683e-05	Up-regulated
AST_2501	---NA---	3.465	8.36705e-12	Up-regulated
AST_18319	atp synthase beta subunit	3.465	7.91809e-09	Up-regulated
AST_15740	transcription factor-like	3.465	8.04774e-07	Up-regulated
AST_9520	uncharacterized protein	3.465	2.84211e-09	Up-regulated
AST_15181	zinc knuckle family protein	3.465	1.54992e-06	Up-regulated
AST_14755	protein	3.465	2.98058e-06	Up-regulated
AST_14758	10-formyltetrahydrofolate synthetase	3.465	2.98058e-06	Up-regulated
AST_14763	---NA---	3.465	2.98058e-06	Up-regulated
AST_15689	uncharacterized protein	3.465	8.04774e-07	Up-regulated
AST_15701	60s ribosomal protein l10a-1	3.465	8.04774e-07	Up-regulated
AST_18962	---NA---	3.465	1.94171e-08	Up-regulated
AST_13647	---NA---	3.465	5.72265e-06	Up-regulated
AST_16462	---NA---	3.465	4.17295e-07	Up-regulated
AST_18119	conserved hypothetical protein [Streptomyces sp. SPB78]	3.465	1.53702e-08	Up-regulated
AST_18151	---NA---	3.465	1.53702e-08	Up-regulated
AST_15226	---NA---	3.465	2.26781e-12	Up-regulated
AST_2885	---NA---	3.465	1.53702e-08	Up-regulated
AST_19127	---NA---	3.465	1.02473e-08	Up-regulated
AST_15499	manganese transport protein	3.465	1.54992e-06	Up-regulated
AST_15369	calcineurin subunit b	3.465	1.54992e-06	Up-regulated
AST_19730	chk1 checkpoint-like protein	3.465	5.40028e-09	Up-regulated
AST_14303	---NA---	3.465	2.98058e-06	Up-regulated
AST_17614	---NA---	3.465	5.77529e-08	Up-regulated
AST_397	---NA---	3.465	1.12708e-10	Up-regulated
AST_14224	hypothetical protein OsJ_19808 [Oryza sativa Japonica Group]	3.465	2.98058e-06	Up-regulated
AST_20118	---NA---	3.465	1.49386e-09	Up-regulated
AST_15957	---NA---	3.465	8.04774e-07	Up-regulated
AST_15455	---NA---	3.465	1.17925e-12	Up-regulated
AST_13982	---NA---	3.465	5.72265e-06	Up-regulated
AST_3065	---NA---	3.465	7.91809e-09	Up-regulated
AST_15788	retrotransposon ty1-copia subclass	3.465	8.04774e-07	Up-regulated
AST_16419	---NA---	3.465	4.17295e-07	Up-regulated
AST_6857	---NA---	3.465	1.6508e-13	Up-regulated
AST_18206	---NA---	3.465	1.53702e-08	Up-regulated
AST_18928	---NA---	3.465	1.94171e-08	Up-regulated
AST_16714	atp-dependent protease clp atpase subunit	3.465	1.10135e-19	Up-regulated
AST_15277	---NA---	3.465	1.54992e-06	Up-regulated
AST_15288	---NA---	3.465	1.54992e-06	Up-regulated
AST_16176	dna-directed rna polymerase	3.465	1.6508e-13	Up-regulated
AST_18474	---NA---	3.465	7.91809e-09	Up-regulated
AST_19060	---NA---	3.465	1.94171e-08	Up-regulated
AST_16784	hypothetical protein OsJ_13103 [Oryza sativa Japonica Group]	3.465	2.16102e-07	Up-regulated
AST_16575	---NA---	3.465	2.16102e-07	Up-regulated
AST_12446	protein	3.465	1.12708e-10	Up-regulated
AST_14477	---NA---	3.465	2.98058e-06	Up-regulated
AST_17733	---NA---	3.465	2.98084e-08	Up-regulated
AST_13567	---NA---	3.465	5.72265e-06	Up-regulated
AST_17301	predicted protein [Hordeum vulgare subsp. vulgare]	3.465	5.77529e-08	Up-regulated
AST_17307	---NA---	3.465	5.77529e-08	Up-regulated
AST_16220	---NA---	3.465	4.17295e-07	Up-regulated
AST_13849	---NA---	3.465	2.70764e-32	Up-regulated
AST_12514	retrotransposon ty3-gypsy subclass	3.465	1.09683e-05	Up-regulated
AST_17828	---NA---	3.465	2.98084e-08	Up-regulated
AST_1890	---NA---	3.465	2.98084e-08	Up-regulated
AST_10869	---NA---	3.465	7.84246e-10	Up-regulated
AST_8346	alanine aminotransferase	3.465	5.40028e-09	Up-regulated
AST_17169	---NA---	3.465	1.11778e-07	Up-regulated
AST_15841	serine threonine kinase	3.465	8.04774e-07	Up-regulated
AST_13101	cinnamoyl reductase-like protein	3.465	1.09683e-05	Up-regulated
AST_15254	---NA---	3.465	1.54992e-06	Up-regulated
AST_15032	protein	3.465	1.54992e-06	Up-regulated
AST_14080	protein	3.465	5.72265e-06	Up-regulated
AST_14096	retrotransposon unclassified	3.465	5.72265e-06	Up-regulated
AST_14111	---NA---	3.465	5.72265e-06	Up-regulated
AST_15138	abscisic acid insensitive 8 homologue	3.465	1.54992e-06	Up-regulated
AST_16379	retrotransposon unclassified	3.465	4.17295e-07	Up-regulated
AST_798	germin protein type 1	3.44162	0	Up-regulated
AST_7560	s-adenosylmethionine decarboxylase	3.42886	0	Up-regulated
AST_6366	---NA---	3.4192	3.14638e-62	Up-regulated
AST_308	retrotransposon ty3-gypsy subclass	3.4036	1.30878e-07	Up-regulated
AST_777	germin protein type 1	3.39778	0	Up-regulated
AST_542	---NA---	3.391	1.94171e-08	Up-regulated
AST_1146	---NA---	3.387	6.96544e-53	Up-regulated
AST_8950	s-adenosylmethionine decarboxylase	3.38593	0	Up-regulated
AST_782	gag-pol polyprotein	3.37189	1.94171e-08	Up-regulated
AST_394	transposon en spm sub-class	3.37189	2.98058e-06	Up-regulated
AST_5791	---NA---	3.37189	1.30144e-15	Up-regulated
AST_5421	retrotransposon ty3-gypsy subclass	3.3654	0	Up-regulated
AST_6395	---NA---	3.36372	2.03141e-214	Up-regulated
AST_8207	---NA---	3.3609	1.27763e-299	Up-regulated
AST_3419	---NA---	3.33947	3.07656e-11	Up-regulated
AST_4277	60s ribosomal protein l33-b	3.33947	3.09873e-21	Up-regulated
AST_8625	eukaryotic translation initiation factor 2 beta subunit	3.33947	5.52258e-12	Up-regulated
AST_2686	---NA---	3.33947	5.8914e-11	Up-regulated
AST_973	---NA---	3.33947	4.74677e-15	Up-regulated
AST_19094	retrotransposon ty3-gypsy subclass	3.33947	1.25484e-22	Up-regulated
AST_8899	chaperonin cpn60- mitochondrial expressed	3.322	0	Up-regulated
AST_2127	---NA---	3.313	2.44481e-16	Up-regulated
AST_5195	protein	3.313	5.25e-18	Up-regulated
AST_398	---NA---	3.29508	1.96847e-11	Up-regulated
AST_3534	---NA---	3.27997	9.61145e-85	Up-regulated
AST_9287	---NA---	3.27236	3.67376e-08	Up-regulated
AST_11896	---NA---	3.27236	5.40028e-09	Up-regulated
AST_16246	chitin-inducible gibberellin-responsive protein	3.27236	6.98424e-11	Up-regulated
AST_8320	-bisphosphoglycerate-independent phosphoglycerate mutase	3.27236	6.93987e-08	Up-regulated
AST_13807	---NA---	3.27236	7.84246e-10	Up-regulated
AST_12075	---NA---	3.27236	5.40028e-09	Up-regulated
AST_10497	---NA---	3.27236	1.94171e-08	Up-regulated
AST_3269	---NA---	3.27236	8.68134e-07	Up-regulated
AST_3993	---NA---	3.27236	8.68134e-07	Up-regulated
AST_910	transposon en spm sub-class	3.27236	4.29292e-13	Up-regulated
AST_14831	gag-pol polyprotein	3.27236	2.15403e-10	Up-regulated
AST_7115	non-specific serine threonine protein kinase	3.27236	1.30878e-07	Up-regulated
AST_2865	---NA---	3.27236	8.68134e-07	Up-regulated
AST_192	protein	3.26278	0	Up-regulated
AST_753	hydroxyproline-rich glyco	3.24261	2.54052e-48	Up-regulated
AST_13346	rna-binding protein 25	3.23054	1.02056e-40	Up-regulated
AST_3788	---NA---	3.23054	1.55471e-30	Up-regulated
AST_17087	protein	3.21989	1.90999e-163	Up-regulated
AST_7967	transposon en spm sub-class	3.20197	1.31315e-10	Up-regulated
AST_14674	u5 small nuclear ribonucleoprotein helicase	3.20197	2.59362e-13	Up-regulated
AST_932	poly polymerase catalytic domain containing expressed	3.20197	3.03281e-06	Up-regulated
AST_4077	retrotransposon expressed	3.20197	2.55917e-27	Up-regulated
AST_3854	---NA---	3.20197	1.6189e-09	Up-regulated
AST_6343	---NA---	3.20197	4.62375e-10	Up-regulated
AST_10338	protein kinase family protein	3.20197	1.96847e-11	Up-regulated
AST_456	---NA---	3.18121	4.25801e-17	Up-regulated
AST_3756	---NA---	3.16544	1.49657e-23	Up-regulated
AST_1007	---NA---	3.16544	1.94705e-08	Up-regulated
AST_7893	hypothetical protein LOC100193661 [Zea mays]	3.14456	0	Up-regulated
AST_7008	---NA---	3.13271	3.82536e-279	Up-regulated
AST_13641	---NA---	3.12212	8.80185e-48	Up-regulated
AST_11889	---NA---	3.11708	1.36324e-24	Up-regulated
AST_18121	---NA---	3.11072	1.55341e-157	Up-regulated
AST_888	eukaryotic translation initiation factor 5	3.09727	2.44486e-17	Up-regulated
AST_1630	pdr-like abc transporter	3.09614	1.81867e-97	Up-regulated
AST_14980	---NA---	3.0927	0	Up-regulated
AST_10855	helicase-like protein	3.05682	1.41447e-210	Up-regulated
AST_7996	---NA---	3.04997	1.62447e-06	Up-regulated
AST_19160	nadh dehydrogenase subunit 4	3.04997	3.03281e-06	Up-regulated
AST_7007	---NA---	3.04997	5.91437e-12	Up-regulated
AST_20113	protein	3.04997	8.68134e-07	Up-regulated
AST_19266	---NA---	3.04997	3.03281e-06	Up-regulated
AST_20145	---NA---	3.04997	4.62949e-07	Up-regulated
AST_20188	---NA---	3.04997	4.62949e-07	Up-regulated
AST_9289	---NA---	3.04997	8.6582e-10	Up-regulated
AST_6801	gras family transcription factor containing expressed	3.04997	3.03281e-06	Up-regulated
AST_14581	---NA---	3.04997	1.10143e-11	Up-regulated
AST_4954	grpe like protein	3.04997	1.04823e-08	Up-regulated
AST_15531	white-brown-complex abc transporter family	3.04997	1.94705e-08	Up-regulated
AST_17939	---NA---	3.04997	4.46371e-10	Up-regulated
AST_4405	pyruvate kinase	3.04997	5.64826e-06	Up-regulated
AST_1035	---NA---	3.04997	5.91437e-12	Up-regulated
AST_4158	nb-arc domain containing expressed	3.04997	5.64826e-06	Up-regulated
AST_14070	---NA---	3.04997	1.27184e-21	Up-regulated
AST_5233	conserved protein	3.04997	1.5706e-16	Up-regulated
AST_19662	---NA---	3.04997	1.62447e-06	Up-regulated
AST_19690	---NA---	3.04997	1.62447e-06	Up-regulated
AST_19206	apocytochrome b	3.04997	3.03281e-06	Up-regulated
AST_19208	---NA---	3.04997	3.03281e-06	Up-regulated
AST_19461	d1 protein	3.04997	1.62447e-06	Up-regulated
AST_14715	---NA---	3.04997	6.67954e-08	Up-regulated
AST_15017	---NA---	3.04997	3.26458e-19	Up-regulated
AST_20196	---NA---	3.04997	4.62949e-07	Up-regulated
AST_20204	---NA---	3.04997	4.62949e-07	Up-regulated
AST_12587	gtpase activating protein	3.04997	4.17784e-07	Up-regulated
AST_3358	---NA---	3.04997	3.60983e-08	Up-regulated
AST_18960	glutamate-gated kainate-type ion channel receptor subunit 5	3.04997	3.03281e-06	Up-regulated
AST_10378	hypothetical protein OsJ_02383 [Oryza sativa Japonica Group]	3.04997	2.46574e-10	Up-regulated
AST_11635	---NA---	3.04997	1.30878e-07	Up-regulated
AST_16054	---NA---	3.04997	5.63337e-09	Up-regulated
AST_18475	---NA---	3.04997	1.04916e-05	Up-regulated
AST_18485	---NA---	3.04997	1.04916e-05	Up-regulated
AST_17162	translation initiation factor if-2	3.04997	3.8532e-18	Up-regulated
AST_18328	---NA---	3.04997	1.04916e-05	Up-regulated
AST_19400	---NA---	3.04997	1.62447e-06	Up-regulated
AST_15578	family transcriptional regulator	3.04997	1.94705e-08	Up-regulated
AST_14396	ribulose- -bisphosphate carboxylase oxygenase large subunit	3.04997	2.08144e-18	Up-regulated
AST_3027	transposon en spm sub-class	3.04997	1.04916e-05	Up-regulated
AST_20300	negatively light-regulated protein	3.04997	4.62949e-07	Up-regulated
AST_4059	---NA---	3.04997	2.63275e-13	Up-regulated
AST_1682	---NA---	3.04997	8.22884e-10	Up-regulated
AST_20499	---NA---	3.04997	4.62949e-07	Up-regulated
AST_17423	retrotransposon line subclass	3.04997	1.12342e-18	Up-regulated
AST_6522	predicted protein [Hordeum vulgare subsp. vulgare]	3.04997	3.03281e-06	Up-regulated
AST_19308	---NA---	3.04997	1.62447e-06	Up-regulated
AST_7242	adenylate kinase family protein	3.04997	1.62447e-06	Up-regulated
AST_18254	---NA---	3.04997	1.04916e-05	Up-regulated
AST_12941	prli-interacting factor k	3.04997	3.80747e-50	Up-regulated
AST_3420	---NA---	3.04997	1.04916e-05	Up-regulated
AST_761	---NA---	3.04997	4.4857e-17	Up-regulated
AST_1040	hypothetical protein OsI_17328 [Oryza sativa Indica Group]	3.04997	3.03281e-06	Up-regulated
AST_7868	---NA---	3.04997	1.62447e-06	Up-regulated
AST_516	---NA---	3.04997	1.62447e-06	Up-regulated
AST_10745	wd-40 repeat expressed	3.04997	2.46382e-07	Up-regulated
AST_18815	---NA---	3.04997	5.64826e-06	Up-regulated
AST_18704	reverse transcriptase family protein	3.04997	5.64826e-06	Up-regulated
AST_18731	tetratricopeptide repeat-containing protein	3.04997	5.64826e-06	Up-regulated
AST_10535	protein kinase domain-containing protein	3.04997	4.62949e-07	Up-regulated
AST_9619	dnaj protein	3.04997	3.42189e-15	Up-regulated
AST_11557	---NA---	3.04997	1.74391e-47	Up-regulated
AST_1840	---NA---	3.04997	1.06487e-30	Up-regulated
AST_19870	---NA---	3.04997	8.68134e-07	Up-regulated
AST_19901	---NA---	3.04997	8.68134e-07	Up-regulated
AST_14632	---NA---	3.04563	0	Up-regulated
AST_6823	cold shock protein	3.03437	8.73838e-162	Up-regulated
AST_510	---NA---	3.0152	1.00062e-15	Up-regulated
AST_2866	---NA---	2.97958	1.522e-16	Up-regulated
AST_283	predicted protein [Hordeum vulgare subsp. vulgare]	2.97402	7.05748e-11	Up-regulated
AST_2931	translation elongation factor-1 alpha	2.96254	0	Up-regulated
AST_1224	---NA---	2.9625	7.49053e-33	Up-regulated
AST_3658	---NA---	2.95043	3.06757e-12	Up-regulated
AST_11286	dehydration responsive factor 1 variant 3	2.95043	6.3181e-15	Up-regulated
AST_458	elongation factor 1-	2.94082	0	Up-regulated
AST_811	hypothetical protein VITISV_009275 [Vitis vinifera]	2.93893	9.00928e-13	Up-regulated
AST_7601	fusarium resistance protein i2c-5-like	2.93449	6.45861e-63	Up-regulated
AST_3321	retrotransposon expressed	2.93067	1.18576e-45	Up-regulated
AST_274	elongation factor 1-alpha	2.92473	0	Up-regulated
AST_6640	40s ribosomal protein s7	2.92444	1.30715e-10	Up-regulated
AST_7059	os04g02110-like protein	2.92444	3.89324e-10	Up-regulated
AST_11161	---NA---	2.92444	1.0389e-11	Up-regulated
AST_5399	hsf-type dna-binding domain containing expressed	2.90558	4.60766e-16	Up-regulated
AST_9310	mei2-like protein	2.88004	5.65474e-08	Up-regulated
AST_16333	terpene synthase metal binding domain containing expressed	2.88004	3.49846e-11	Up-regulated
AST_4640	poly polymerase catalytic domain containing expressed	2.88004	2.27263e-07	Up-regulated
AST_9536	ribulose- -bisphosphate carboxylase oxygenase large subunit	2.88004	5.65474e-08	Up-regulated
AST_11744	gag-pol polyprotein	2.88004	9.33801e-09	Up-regulated
AST_3178	---NA---	2.88004	4.17784e-07	Up-regulated
AST_6786	protein	2.88004	6.67954e-08	Up-regulated
AST_9369	---NA---	2.88004	1.73122e-15	Up-regulated
AST_2969	---NA---	2.88004	4.17784e-07	Up-regulated
AST_18359	---NA---	2.88004	2.44475e-13	Up-regulated
AST_43	rna polymerase beta subunit	2.88004	1.04916e-05	Up-regulated
AST_19650	---NA---	2.88004	5.80134e-15	Up-regulated
AST_14428	ribulose- -bisphosphate carboxylase oxygenase large subunit	2.87218	5.31678e-67	Up-regulated
AST_287	elongation factor 1-alpha	2.86945	0	Up-regulated
AST_247	---NA---	2.8671	2.32898e-09	Up-regulated
AST_20487	dna-binding protein s1fa	2.86093	4.77945e-93	Up-regulated
AST_1521	serine threonine-protein kinase	2.85867	1.42948e-92	Up-regulated
AST_7387	protein	2.85546	3.74015e-81	Up-regulated
AST_9839	structural maintenance of chromosomes 1	2.85327	2.49143e-80	Up-regulated
AST_525	elongation factor 1-	2.84779	0	Up-regulated
AST_1799	---NA---	2.84352	3.89324e-10	Up-regulated
AST_20223	---NA---	2.84352	3.78419e-24	Up-regulated
AST_1816	---NA---	2.84352	3.89324e-10	Up-regulated
AST_4095	---NA---	2.83424	2.02339e-48	Up-regulated
AST_14748	---NA---	2.83424	7.58669e-35	Up-regulated
AST_6206	---NA---	2.82757	1.52543e-15	Up-regulated
AST_486	---NA---	2.82757	7.66159e-07	Up-regulated
AST_3461	---NA---	2.82305	6.83199e-270	Up-regulated
AST_1658	---NA---	2.81864	6.61606e-17	Up-regulated
AST_15462	zingiberene synthase 1	2.81459	4.29291e-90	Up-regulated
AST_214	---NA---	2.81293	4.17784e-07	Up-regulated
AST_900	---NA---	2.80381	3.84966e-62	Up-regulated
AST_16878	---NA---	2.78693	3.35395e-07	Up-regulated
AST_17251	---NA---	2.78693	1.85749e-07	Up-regulated
AST_17129	nuclear matrix constituent protein 1-like	2.78693	1.85749e-07	Up-regulated
AST_18138	oxysterol-binding family protein	2.78693	2.39888e-22	Up-regulated
AST_1017	transposon en spm sub-class	2.78693	2.55643e-06	Up-regulated
AST_14968	---NA---	2.78693	1.40142e-06	Up-regulated
AST_17678	cell wall-associated hydrolase	2.78693	9.26939e-22	Up-regulated
AST_12954	---NA---	2.78693	8.43151e-06	Up-regulated
AST_13594	transcription factor iiia	2.78693	4.64987e-06	Up-regulated
AST_18625	---NA---	2.78693	9.33801e-09	Up-regulated
AST_14704	---NA---	2.78693	2.55643e-06	Up-regulated
AST_20409	---NA---	2.78693	3.89324e-10	Up-regulated
AST_2508	---NA---	2.78693	4.15748e-15	Up-regulated
AST_15408	trna-glutamine synthetase	2.77166	1.07501e-104	Up-regulated
AST_2410	asc1-like protein 1	2.76757	3.47489e-27	Up-regulated
AST_255	---NA---	2.75779	4.10586e-12	Up-regulated
AST_1143	---NA---	2.75451	9.70063e-14	Up-regulated
AST_3	rna polymerase beta subunit	2.75343	1.02611e-07	Up-regulated
AST_1229	trna-glutamine synthetase	2.74946	6.93413e-59	Up-regulated
AST_3521	40s ribosomal protein s9	2.74596	2.27294e-175	Up-regulated
AST_6468	---NA---	2.74511	1.64879e-14	Up-regulated
AST_17445	---NA---	2.73509	4.27571e-107	Up-regulated
AST_1631	---NA---	2.73179	1.04744e-51	Up-regulated
AST_7080	retroelement pol poly	2.72804	1.75487e-10	Up-regulated
AST_425	protein	2.71354	1.19676e-164	Up-regulated
AST_11829	---NA---	2.69947	1.37009e-36	Up-regulated
AST_593	---NA---	2.69633	2.6767e-19	Up-regulated
AST_11125	nucleolar protein expressed	2.69197	2.8747e-273	Up-regulated
AST_13040	---NA---	2.6874	2.50018e-07	Up-regulated
AST_12675	---NA---	2.6874	1.02611e-07	Up-regulated
AST_11032	---NA---	2.6874	3.35395e-07	Up-regulated
AST_2946	cyclophilin	2.6874	4.64987e-06	Up-regulated
AST_9205	sit4 phosphatase-associated-like protein	2.6874	1.08462e-06	Up-regulated
AST_13223	ent-kaurene synthase 1	2.6874	2.50018e-07	Up-regulated
AST_2310	---NA---	2.67446	7.61138e-26	Up-regulated
AST_19597	---NA---	2.67446	8.07627e-59	Up-regulated
AST_5895	something about silencing protein	2.65765	1.38251e-12	Up-regulated
AST_434	integral membrane protein	2.64943	7.88075e-08	Up-regulated
AST_7702	---NA---	2.64943	1.46058e-115	Up-regulated
AST_13502	structural maintenance of chromosomes 1	2.64943	1.44158e-71	Up-regulated
AST_1659	protein	2.64943	1.43568e-64	Up-regulated
AST_461	---NA---	2.64558	7.64285e-11	Up-regulated
AST_12304	copia-type pol polyprotein	2.63493	5.80772e-09	Up-regulated
AST_5409	retrotransposon unclassified	2.63493	2.50018e-07	Up-regulated
AST_1056	---NA---	2.62254	8.07664e-16	Up-regulated
AST_16492	---NA---	2.61701	2.3561e-23	Up-regulated
AST_6949	protein	2.61525	1.08096e-67	Up-regulated
AST_15275	---NA---	2.60251	2.45093e-12	Up-regulated
AST_1203	nac-domain transcription factor	2.59827	3.31681e-114	Up-regulated
AST_18078	qm-like protein	2.5854	0	Up-regulated
AST_7512	alpha beta fold family protein	2.58165	2.51954e-152	Up-regulated
AST_836	---NA---	2.58048	1.94195e-06	Up-regulated
AST_9166	---NA---	2.58048	3.2455e-11	Up-regulated
AST_16217	---NA---	2.57192	2.33612e-31	Up-regulated
AST_12099	---NA---	2.56454	1.3689e-13	Up-regulated
AST_10283	---NA---	2.56454	5.80636e-13	Up-regulated
AST_9469	---NA---	2.55811	2.17653e-50	Up-regulated
AST_5605	cell wall invertase	2.5552	2.38604e-182	Up-regulated
AST_692	protein	2.55247	4.43481e-07	Up-regulated
AST_3208	---NA---	2.54907	2.0359e-35	Up-regulated
AST_1714	retrotransposon ty3-gypsy subclass	2.54842	3.59017e-55	Up-regulated
AST_7457	g1 to s phase transition protein	2.54301	5.94106e-15	Up-regulated
AST_1734	---NA---	2.54301	1.02343e-12	Up-regulated
AST_10601	transposon en spm sub-class	2.53776	4.76075e-49	Up-regulated
AST_14816	---NA---	2.5239	4.46882e-48	Up-regulated
AST_3620	uncharacterized protein	2.51945	1.12047e-18	Up-regulated
AST_6204	---NA---	2.51563	3.82339e-21	Up-regulated
AST_6523	protein	2.49657	5.7019e-159	Up-regulated
AST_841	transposon en spm sub-class	2.49357	6.69915e-21	Up-regulated
AST_18282	---NA---	2.49009	1.14015e-145	Up-regulated
AST_11347	---NA---	2.465	1.29156e-05	Up-regulated
AST_19108	photosystem ii 32 kda protein	2.465	1.38292e-06	Up-regulated
AST_711	---NA---	2.465	1.29156e-05	Up-regulated
AST_19478	---NA---	2.465	7.84341e-07	Up-regulated
AST_7709	protein	2.465	4.00469e-08	Up-regulated
AST_15608	photosystem ii protein d1	2.465	9.43274e-07	Up-regulated
AST_17982	---NA---	2.465	1.29156e-05	Up-regulated
AST_3279	photosystem ii 32kda protein	2.465	4.25678e-06	Up-regulated
AST_13079	ribosomal rna apurinic site specific lyase	2.465	2.35993e-16	Up-regulated
AST_6472	clumping factor b	2.465	2.99323e-13	Up-regulated
AST_1023	---NA---	2.465	2.29277e-08	Up-regulated
AST_16648	hypothetical protein SORBIDRAFT_03g039445 [Sorghum bicolor]	2.465	5.54947e-12	Up-regulated
AST_8790	---NA---	2.465	2.45063e-18	Up-regulated
AST_10955	grpe like protein	2.465	1.57094e-08	Up-regulated
AST_9646	hypothetical protein SORBIDRAFT_03g020186 [Sorghum bicolor]	2.465	1.3093e-08	Up-regulated
AST_17002	retrotransposon unclassified	2.465	1.18346e-09	Up-regulated
AST_6582	cytochrome p450	2.465	4.62837e-19	Up-regulated
AST_3043	rpl32	2.465	6.25163e-20	Up-regulated
AST_4519	retrotransposon ty3-gypsy subclass	2.465	1.00907e-07	Up-regulated
AST_18618	---NA---	2.465	2.43041e-06	Up-regulated
AST_18427	protein kinase xa21	2.465	4.25678e-06	Up-regulated
AST_16946	---NA---	2.465	5.56583e-10	Up-regulated
AST_6783	---NA---	2.465	1.21193e-07	Up-regulated
AST_8947	hypothetical protein [Zea mays]	2.465	7.10448e-27	Up-regulated
AST_17031	uncharacterized protein	2.465	1.09303e-05	Up-regulated
AST_1711	---NA---	2.465	4.00469e-08	Up-regulated
AST_18169	---NA---	2.465	7.42885e-06	Up-regulated
AST_4119	predicted protein [Hordeum vulgare subsp. vulgare]	2.465	6.81553e-10	Up-regulated
AST_8288	ac077693_13 pathogen-related protein rir1b	2.44246	1.01583e-177	Up-regulated
AST_15351	transposon expressed	2.43699	3.70785e-49	Up-regulated
AST_13296	---NA---	2.43384	0	Up-regulated
AST_8499	protein	2.42548	3.50167e-51	Up-regulated
AST_1492	u5 small nuclear ribonucleoprotein helicase	2.42193	7.73422e-20	Up-regulated
AST_3386	scarecrow-like transcription factor pat1	2.4192	3.13394e-20	Up-regulated
AST_12810	brassinosteroid insensitive 1-associated receptor kinase 1	2.40891	0	Up-regulated
AST_1236	protein	2.4003	2.22742e-57	Up-regulated
AST_5962	sister chromatid cohesion 1 protein 2	2.391	1.20353e-13	Up-regulated
AST_166	gag-pol polyprotein	2.391	3.10966e-26	Up-regulated
AST_15634	atp binding	2.38254	2.40726e-48	Up-regulated
AST_3606	c99a1_sorbi ame: full=cytochrome p450 cyp99a1	2.38254	1.18384e-11	Up-regulated
AST_7145	---NA---	2.38254	1.56893e-12	Up-regulated
AST_8314	---NA---	2.37189	2.02799e-21	Up-regulated
AST_2341	far-red impaired response protein	2.37189	2.44973e-27	Up-regulated
AST_1	---NA---	2.35929	1.43018e-05	Up-regulated
AST_10850	---NA---	2.35809	1.81328e-10	Up-regulated
AST_16536	---NA---	2.35298	1.59735e-158	Up-regulated
AST_1777	---NA---	2.35179	4.16498e-55	Up-regulated
AST_5919	---NA---	2.34322	8.29471e-121	Up-regulated
AST_4683	---NA---	2.33947	8.07063e-08	Up-regulated
AST_12646	---NA---	2.33947	1.37734e-09	Up-regulated
AST_5595	nbs-lrr disease resistance protein homologue	2.33947	8.07964e-22	Up-regulated
AST_10365	retrotransposon protein	2.33947	3.54407e-09	Up-regulated
AST_1064	---NA---	2.33947	8.36619e-06	Up-regulated
AST_7634	---NA---	2.33947	5.26701e-08	Up-regulated
AST_10217	---NA---	2.33174	6.89742e-66	Up-regulated
AST_1124	---NA---	2.3275	2.22831e-19	Up-regulated
AST_622	---NA---	2.32298	8.00976e-10	Up-regulated
AST_11569	abc transporter family protein	2.32061	4.26637e-29	Up-regulated
AST_11196	60s ribosomal protein l15	2.31969	0	Up-regulated
AST_17204	---NA---	2.313	1.81328e-10	Up-regulated
AST_13361	kinesin-related protein	2.313	5.26701e-08	Up-regulated
AST_14936	---NA---	2.30654	0	Up-regulated
AST_17787	---NA---	2.29508	3.21393e-18	Up-regulated
AST_921	glutathione reductase	2.28443	1.24163e-12	Up-regulated
AST_8586	grpe like protein	2.27236	1.43018e-05	Up-regulated
AST_16802	---NA---	2.27236	8.96293e-08	Up-regulated
AST_7369	23s ribosomal rna	2.27236	1.25354e-18	Up-regulated
AST_1483	---NA---	2.27236	6.16844e-12	Up-regulated
AST_10550	---NA---	2.27236	1.33439e-10	Up-regulated
AST_12255	cationic amino acid transporter	2.27236	5.30075e-06	Up-regulated
AST_20065	---NA---	2.27236	1.20258e-10	Up-regulated
AST_17219	---NA---	2.2363	0	Up-regulated
AST_17008	---NA---	2.21346	0	Up-regulated
AST_8529	H0805A05.2 [Oryza sativa Indica Group]	2.20197	2.57249e-07	Up-regulated
AST_5812	---NA---	2.20197	4.04061e-07	Up-regulated
AST_17236	---NA---	2.20197	5.30075e-06	Up-regulated
AST_3731	cytochrome p450 family expressed	2.20197	4.39447e-12	Up-regulated
AST_20402	s-adenosylmethionine synthetase	2.20197	1.61702e-07	Up-regulated
AST_10862	retroelement pol poly	2.20197	9.62841e-08	Up-regulated
AST_16063	neurofilament triplet m protein	2.20197	1.43018e-05	Up-regulated
AST_547	---NA---	2.1755	3.81125e-10	Up-regulated
AST_9379	40s ribosomal protein s8	2.17245	1.81818e-159	Up-regulated
AST_18019	---NA---	2.16544	8.72814e-67	Up-regulated
AST_14764	cytochrome p450	2.15466	3.00907e-39	Up-regulated
AST_3822	scarecrow-like transcription factor pat1	2.15306	8.94096e-17	Up-regulated
AST_4065	---NA---	2.14308	1.67628e-22	Up-regulated
AST_11229	---NA---	2.14308	1.96518e-06	Up-regulated
AST_16651	hypothetical protein SORBIDRAFT_03g039445 [Sorghum bicolor]	2.14308	2.14687e-08	Up-regulated
AST_12072	40s ribosomal protein s2	2.13972	0	Up-regulated
AST_5145	---NA---	2.1396	5.50677e-46	Up-regulated
AST_573	---NA---	2.13638	4.70349e-12	Up-regulated
AST_13990	---NA---	2.1357	3.92913e-57	Up-regulated
AST_1928	far-red impaired response protein	2.13485	1.90446e-18	Up-regulated
AST_3586	---NA---	2.12797	3.47096e-11	Up-regulated
AST_9406	---NA---	2.12683	1.0317e-64	Up-regulated
AST_10924	membrane associated ring finger	2.12212	6.87839e-53	Up-regulated
AST_11197	---NA---	2.11708	6.10532e-78	Up-regulated
AST_12930	60s ribosomal protein l10-3	2.11708	1.39444e-08	Up-regulated
AST_1388	---NA---	2.11708	2.38664e-31	Up-regulated
AST_9664	---NA---	2.10942	3.01708e-97	Up-regulated
AST_3422	---NA---	2.09727	1.33944e-32	Up-regulated
AST_1996	ubiquitin-conjugating enzyme e2 i	2.08649	9.951e-11	Up-regulated
AST_14045	---NA---	2.08347	0	Up-regulated
AST_473	pg1 homology to homo sapiens	2.07798	1.26526e-22	Up-regulated
AST_10076	metal-nicotianamine transporter ysl6	2.07798	1.07844e-16	Up-regulated
AST_15781	---NA---	2.07506	1.11094e-23	Up-regulated
AST_3181	---NA---	2.07072	1.30923e-18	Up-regulated
AST_6425	ribosomal protein l19	2.06849	8.58011e-105	Up-regulated
AST_8685	---NA---	2.04997	1.02949e-07	Up-regulated
AST_8302	protein phosphatase	2.04997	3.2087e-09	Up-regulated
AST_17777	protein	2.04997	1.6217e-28	Up-regulated
AST_6748	protein decoy	2.04997	1.01249e-10	Up-regulated
AST_9597	xanthine uracil vitamin c permease	2.04997	5.53002e-15	Up-regulated
AST_7103	protein	2.04997	5.61551e-06	Up-regulated
AST_20023	protein	2.04997	6.27257e-08	Up-regulated
AST_18054	pentatricopeptide repeat-containing protein	2.04997	1.24205e-06	Up-regulated
AST_3935	cytochrome p450	2.04997	4.45015e-10	Up-regulated
AST_16904	---NA---	2.04997	2.03835e-06	Up-regulated
AST_19776	hypothetical protein SORBIDRAFT_03g020186 [Sorghum bicolor]	2.04997	2.30632e-11	Up-regulated
AST_11375	---NA---	2.04997	7.51558e-07	Up-regulated
AST_18270	---NA---	2.03885	0	Up-regulated
AST_16561	---NA---	2.03758	4.44094e-48	Up-regulated
AST_11236	---NA---	2.03269	3.13491e-51	Up-regulated
AST_823	40s ribosomal protein s8	2.03204	6.73192e-70	Up-regulated
AST_310	pg1 homology to homo sapiens	2.0276	4.16841e-17	Up-regulated
AST_963	transposon en spm sub-class	2.01249	1.69523e-07	Up-regulated
AST_8000	---NA---	2.01249	9.33869e-22	Up-regulated
AST_7104	protein	2.00106	4.85726e-16	Up-regulated
AST_6561	---NA---	4.99443	2.24208e-31	Down-regulated
AST_12809	magnesium chelatase h-like protein	4.48919	1.30856e-146	Down-regulated
AST_19960	dnaj domain containing protein	4.36789	1.17248e-39	Down-regulated
AST_668	bgl02_orysj ame: full=beta-glucosidase 2 short=os1bglu2 flags: precursor	4.32841	6.82204e-110	Down-regulated
AST_4813	chlorophyll a b-binding protein cp29	4.30539	0	Down-regulated
AST_2907	hypothetical protein SORBIDRAFT_09g030625 [Sorghum bicolor]	4.23544	1.39944e-30	Down-regulated
AST_18132	protein	4.20742	1.78353e-29	Down-regulated
AST_15994	wak80 - receptor-like protein kinase	4.17885	1.04425e-23	Down-regulated
AST_4746	chlorophyll a b-binding protein cp29	4.14823	0	Down-regulated
AST_19573	---NA---	4.08959	3.32339e-60	Down-regulated
AST_1993	jasmonate-induced protein	3.9724	7.92397e-35	Down-regulated
AST_1108	metallothionein-like protein	3.89525	0	Down-regulated
AST_7729	---NA---	3.89255	2.83047e-13	Down-regulated
AST_625	coat protein movement protein	3.85211	1.21549e-81	Down-regulated
AST_3682	major pollen allergen car b 1 isoforms 1a and 1b	3.8204	1.59537e-11	Down-regulated
AST_15867	---NA---	3.78292	6.69035e-33	Down-regulated
AST_4725	dicarboxylate tricarboxylate carrier	3.75996	2.99354e-52	Down-regulated
AST_15387	---NA---	3.74445	7.71239e-16	Down-regulated
AST_12555	---NA---	3.72482	2.50798e-51	Down-regulated
AST_3778	protein	3.70492	7.03865e-11	Down-regulated
AST_10479	oxygen-evolving enhancer protein 3-1	3.58275	5.63217e-133	Down-regulated
AST_2382	---NA---	3.57939	2.63489e-09	Down-regulated
AST_8549	rhodanese family	3.57939	1.55643e-58	Down-regulated
AST_13114	hydroxypyruvate reductase	3.535	4.03086e-12	Down-regulated
AST_7944	sex-linked protein 9	3.51916	0	Down-regulated
AST_11898	ferredoxin-nadp oxidoreductase	3.49979	0	Down-regulated
AST_2168	universal stress protein 5327	3.4836	5.94292e-184	Down-regulated
AST_17935	---NA---	3.46423	0	Down-regulated
AST_3973	---NA---	3.44189	1.27567e-08	Down-regulated
AST_11353	anthranilic acid methyltransferase 1	3.44189	2.42913e-10	Down-regulated
AST_13591	---NA---	3.40902	0	Down-regulated
AST_6794	---NA---	3.36507	1.49414e-134	Down-regulated
AST_11271	photosystem i reaction center subunit iv a	3.3324	0	Down-regulated
AST_16608	photosystem i reaction center subunit xi	3.28988	2.8091e-12	Down-regulated
AST_8700	protein	3.28142	1.7641e-138	Down-regulated
AST_1559	f-box-like protein	3.27726	0	Down-regulated
AST_5616	wound responsive protein	3.25837	1.78155e-79	Down-regulated
AST_714	jasmonate-induced protein	3.25746	5.2638e-18	Down-regulated
AST_11739	far-red impaired responsive family protein	3.24236	8.68218e-63	Down-regulated
AST_293	phosphoribulokinase precursor	3.2028	0	Down-regulated
AST_974	---NA---	3.19932	8.11371e-114	Down-regulated
AST_6029	---NA---	3.16726	1.71213e-91	Down-regulated
AST_237	ribulose bisphosphate carboxylase oxygenase chloroplast expressed	3.15962	0	Down-regulated
AST_15752	---NA---	3.15949	1.69763e-27	Down-regulated
AST_7436	protein	3.15489	0	Down-regulated
AST_11897	ferredoxin-nadp oxidoreductase	3.14765	1.57608e-304	Down-regulated
AST_7803	protein	3.11996	4.59055e-07	Down-regulated
AST_17672	hypothetical protein SORBIDRAFT_03g008680 [Sorghum bicolor]	3.11996	2.25944e-11	Down-regulated
AST_235	ribulose bisphosphate carboxylase oxygenase chloroplast expressed	3.11975	0	Down-regulated
AST_11030	---NA---	3.09719	0	Down-regulated
AST_232	ribulose bisphosphate carboxylase oxygenase chloroplast expressed	3.09407	0	Down-regulated
AST_400	protein	3.08519	9.06987e-15	Down-regulated
AST_294	phosphoribulokinase precursor	3.07074	0	Down-regulated
AST_7028	protein	3.05856	3.38795e-228	Down-regulated
AST_3385	cslf3 - cellulose synthase-like family f glucan synthase	3.05856	3.06796e-72	Down-regulated
AST_3260	protein	3.05856	5.55201e-06	Down-regulated
AST_5858	formamidase-like protein	3.05856	4.68232e-39	Down-regulated
AST_11226	adagio expressed	3.05856	1.69523e-07	Down-regulated
AST_20351	auxin-induced protein pcnt115	3.04279	3.95318e-49	Down-regulated
AST_19834	hypothetical protein OsJ_19881 [Oryza sativa Japonica Group]	3.02685	7.20606e-24	Down-regulated
AST_6354	hypothetical protein OsI_32811 [Oryza sativa Indica Group]	3.01612	4.16841e-17	Down-regulated
AST_605	jasmonate-induced protein	3.00377	9.82378e-18	Down-regulated
AST_17786	gata type zinc finger transcription factor-like protein	3.00368	0	Down-regulated
AST_15024	---NA---	3.00078	0	Down-regulated
AST_4033	---NA---	2.99443	9.06556e-06	Down-regulated
AST_2518	atp-dependent clp protease proteolytic subunit 2	2.99443	2.75937e-24	Down-regulated
AST_1181	fructose- -bisphosphatase	2.97388	0	Down-regulated
AST_13370	dicarboxylate tricarboxylate carrier	2.97271	0	Down-regulated
AST_7325	3 -bisphosphate nucleotidase	2.9724	1.33501e-200	Down-regulated
AST_18717	predicted protein [Hordeum vulgare subsp. vulgare]	2.96126	1.06506e-20	Down-regulated
AST_5139	peroxisomal membrane 22 kda (mpv17 pmp22) family protein	2.96126	2.84771e-20	Down-regulated
AST_4122	stress responsive alpha-beta barrel domain protein	2.93872	6.38646e-29	Down-regulated
AST_9178	---NA---	2.92731	1.12548e-16	Down-regulated
AST_12825	---NA---	2.92731	4.56842e-07	Down-regulated
AST_14341	---NA---	2.92731	1.74954e-20	Down-regulated
AST_14514	ubiquitin-activating enzyme e1 expressed	2.91477	0	Down-regulated
AST_17525	---NA---	2.90423	0	Down-regulated
AST_7021	---NA---	2.89957	3.04706e-119	Down-regulated
AST_3356	far-red impaired responsive family protein	2.89574	6.95228e-49	Down-regulated
AST_5679	protein	2.89255	1.41421e-46	Down-regulated
AST_14312	---NA---	2.86815	0	Down-regulated
AST_4891	photosystem ii 10 kda polypeptide	2.86129	2.75249e-143	Down-regulated
AST_15722	plastocyanin precursor	2.85692	4.9437e-227	Down-regulated
AST_18133	plastocyanin precursor	2.83526	0	Down-regulated
AST_12523	---NA---	2.8204	8.54666e-12	Down-regulated
AST_8778	oxygen-evolving enhancer protein 3-1	2.8204	1.07529e-92	Down-regulated
AST_9399	---NA---	2.8204	1.60269e-10	Down-regulated
AST_8773	stress responsive protein	2.78798	9.89716e-134	Down-regulated
AST_4888	---NA---	2.78292	3.10386e-09	Down-regulated
AST_18259	major pollen allergen car b 1 isoforms 1a and 1b	2.78292	2.79367e-16	Down-regulated
AST_9691	---NA---	2.78292	8.69378e-15	Down-regulated
AST_16157	ribosomal protein s1	2.77491	1.25137e-233	Down-regulated
AST_17249	---NA---	2.74445	2.24727e-14	Down-regulated
AST_14245	---NA---	2.73856	0	Down-regulated
AST_18809	---NA---	2.73501	1.90675e-221	Down-regulated
AST_10620	chlorophyll a-b binding protein cp24	2.73481	2.22442e-305	Down-regulated
AST_5095	---NA---	2.73467	0	Down-regulated
AST_16872	iron ascorbate-dependent oxidoreductase	2.70492	4.09507e-07	Down-regulated
AST_13543	at5g30510-like protein	2.70492	8.22201e-06	Down-regulated
AST_260	alanine-2-oxoglutarate aminotransferase 2	2.69599	0	Down-regulated
AST_20014	uncharacterized protein	2.68005	4.34174e-105	Down-regulated
AST_16088	diaminopimelate epimerase	2.6725	1.33783e-28	Down-regulated
AST_14775	ac116926_16 no apical meristem protein	2.66428	5.30975e-11	Down-regulated
AST_6412	rieske fe-s precursor protein	2.65047	0	Down-regulated
AST_18829	---NA---	2.63653	2.35877e-42	Down-regulated
AST_18066	alanyl-trna synthetase	2.63303	1.9874e-51	Down-regulated
AST_20068	---NA---	2.62246	1.16484e-08	Down-regulated
AST_20423	methylmalonate-semialdehyde dehydrogenase	2.62246	4.59447e-09	Down-regulated
AST_4001	---NA---	2.62246	8.02415e-21	Down-regulated
AST_13129	myb family transcription expressed	2.62246	1.40166e-05	Down-regulated
AST_263	alanine-2-oxoglutarate aminotransferase 2	2.6165	0	Down-regulated
AST_2612	lhc-related protein	2.60333	0	Down-regulated
AST_9958	threonine endopeptidase	2.60293	6.2216e-263	Down-regulated
AST_7527	powdery mildew resistance protein pm3 variant	2.60109	4.23713e-15	Down-regulated
AST_4975	condensation domain-containing protein	2.60109	1.24677e-14	Down-regulated
AST_11832	receptor-like protein	2.59569	1.63569e-128	Down-regulated
AST_13012	2-oxoglutarate malate translocator	2.58336	1.13669e-46	Down-regulated
AST_3281	---NA---	2.57939	6.30498e-26	Down-regulated
AST_381	glycine hydroxymethyltransferase	2.57818	0	Down-regulated
AST_390	serine hydroxymethyltransferase	2.5729	0	Down-regulated
AST_19568	chaperone protein dnaj-like protein	2.57062	1.07724e-69	Down-regulated
AST_11385	resistance to phytophthora 1 protein	2.56685	3.29327e-107	Down-regulated
AST_6695	uncharacterized protein	2.56647	1.94094e-57	Down-regulated
AST_3994	leucine zipper protein	2.55631	0	Down-regulated
AST_16404	atp-dependent dna helicase	2.535	4.81907e-06	Down-regulated
AST_18296	---NA---	2.535	9.83873e-54	Down-regulated
AST_16150	triose phosphate phosphate translocator	2.535	7.66749e-06	Down-regulated
AST_16927	---NA---	2.535	2.82303e-06	Down-regulated
AST_20045	---NA---	2.52678	3.55954e-76	Down-regulated
AST_9665	---NA---	2.52563	0	Down-regulated
AST_12840	rna-binding protein	2.50496	0	Down-regulated
AST_11227	uncharacterized protein	2.50462	9.86715e-12	Down-regulated
AST_12944	protein	2.49847	2.84589e-20	Down-regulated
AST_18926	---NA---	2.48919	2.92485e-60	Down-regulated
AST_8462	condensation domain-containing protein	2.47985	4.28214e-17	Down-regulated
AST_1773	ferredoxin-nadp oxidoreductase	2.47837	0	Down-regulated
AST_10841	protein	2.4736	1.90466e-31	Down-regulated
AST_16129	ribosomal protein s1	2.46967	2.08252e-210	Down-regulated
AST_10588	shoot1 protein	2.46755	6.92372e-87	Down-regulated
AST_2684	protein	2.46573	5.84493e-12	Down-regulated
AST_10574	er lumen protein retaining receptor family protein	2.46573	9.96211e-15	Down-regulated
AST_292	phosphoribulokinase precursor	2.46179	1.81592e-150	Down-regulated
AST_2625	gcst_soltu ame: full= mitochondrial ame: full=glycine cleavage system t protein short=gcvt flags: precursor	2.46165	1.69051e-304	Down-regulated
AST_6215	50s ribosomal protein l31	2.45831	6.68625e-284	Down-regulated
AST_8785	branched-chain amino acid	2.44499	2.76983e-95	Down-regulated
AST_15520	---NA---	2.44189	2.2342e-09	Down-regulated
AST_16694	---NA---	2.44189	7.66749e-06	Down-regulated
AST_8222	ubiquitin conjugating enzyme 2	2.44189	4.5688e-10	Down-regulated
AST_18899	---NA---	2.43116	4.06903e-149	Down-regulated
AST_7148	atp synthase delta chain	2.40971	0	Down-regulated
AST_3329	haloacid dehalogenase-like hydrolase domain-containing protein	2.40967	0	Down-regulated
AST_8105	kn1 homeobox protein	2.40947	7.75623e-10	Down-regulated
AST_17807	---NA---	2.40648	0	Down-regulated
AST_7994	---NA---	2.39298	1.60858e-23	Down-regulated
AST_6929	alpha-galactosidase	2.38272	0	Down-regulated
AST_19990	uncharacterized protein	2.3742	2.94475e-92	Down-regulated
AST_2970	---NA---	2.35518	3.87787e-20	Down-regulated
AST_6355	---NA---	2.34235	1.21701e-08	Down-regulated
AST_16603	photosystem i reaction center subunit xi	2.34235	4.59397e-09	Down-regulated
AST_18104	ribulose- -bisphosphate carboxylase oxygenase large subunit	2.34235	1.37591e-28	Down-regulated
AST_18339	---NA---	2.34235	2.64731e-85	Down-regulated
AST_9813	protein	2.32485	4.80811e-210	Down-regulated
AST_4314	hydroxypyruvate reductase	2.30407	0	Down-regulated
AST_1024	atp synthase gamma chain	2.30255	2.48529e-237	Down-regulated
AST_996	alliin lyase	2.29647	7.34956e-140	Down-regulated
AST_18677	---NA---	2.29337	0	Down-regulated
AST_10716	---NA---	2.28988	5.47779e-12	Down-regulated
AST_606	cysteine protease	2.28121	3.5067e-261	Down-regulated
AST_1239	protein	2.27916	9.9682e-85	Down-regulated
AST_19996	uncharacterized protein	2.27646	2.54576e-82	Down-regulated
AST_6757	protein	2.27429	2.54968e-146	Down-regulated
AST_3116	amino acid permease	2.27196	9.44621e-08	Down-regulated
AST_6531	protein	2.25461	6.45658e-54	Down-regulated
AST_15066	aluminum induced protein with ygl and lrdr motifs	2.25016	1.59629e-234	Down-regulated
AST_8454	---NA---	2.24797	0	Down-regulated
AST_8413	cystathionine beta-synthase domain-containing protein	2.24307	4.27478e-138	Down-regulated
AST_6002	---NA---	2.23999	6.71795e-162	Down-regulated
AST_20035	---NA---	2.23544	3.39852e-06	Down-regulated
AST_16192	protein	2.23544	2.21589e-11	Down-regulated
AST_14114	protein	2.23544	4.33418e-42	Down-regulated
AST_19769	---NA---	2.23544	7.51814e-30	Down-regulated
AST_570	inorganic pyrophosphatase	2.22882	5.18798e-291	Down-regulated
AST_116	thiamine biosynthesis protein	2.22192	4.02482e-58	Down-regulated
AST_18322	predicted protein [Hordeum vulgare subsp. vulgare]	2.21949	2.45095e-29	Down-regulated
AST_495	plastid glutamine synthetase 2	2.21894	0	Down-regulated
AST_19658	Os07g0673600 [Oryza sativa Japonica Group]	2.21464	9.80797e-197	Down-regulated
AST_4061	formamidase-like protein	2.20337	1.31029e-29	Down-regulated
AST_11543	---NA---	2.19993	0	Down-regulated
AST_13710	---NA---	2.19939	6.84772e-145	Down-regulated
AST_8339	---NA---	2.19796	6.88595e-08	Down-regulated
AST_16019	---NA---	2.19796	2.57472e-20	Down-regulated
AST_11803	atp-dependent rna helicase	2.19796	6.86387e-24	Down-regulated
AST_11591	---NA---	2.19796	1.3674e-08	Down-regulated
AST_11359	fatty acid desaturase	2.19451	4.33688e-109	Down-regulated
AST_876	pgr5-like protein 1a	2.1895	3.13206e-100	Down-regulated
AST_10394	protein	2.18707	9.63556e-18	Down-regulated
AST_8895	rubisco activase 2	2.17575	1.40837e-205	Down-regulated
AST_20006	uncharacterized protein	2.17545	3.4179e-77	Down-regulated
AST_10746	---NA---	2.17243	2.01279e-22	Down-regulated
AST_20350	---NA---	2.16863	0	Down-regulated
AST_16312	---NA---	2.16381	3.70131e-167	Down-regulated
AST_12585	geminivirus rep-interacting motor protein	2.1628	2.02519e-117	Down-regulated
AST_7288	protein	2.15949	1.81122e-07	Down-regulated
AST_11445	protein	2.15949	5.23959e-65	Down-regulated
AST_17907	---NA---	2.15238	3.76814e-40	Down-regulated
AST_2680	glycolate oxidase	2.15003	0	Down-regulated
AST_9401	protein	2.14971	8.46095e-45	Down-regulated
AST_7998	actin associated protein	2.14971	2.16203e-09	Down-regulated
AST_16208	---NA---	2.13569	0	Down-regulated
AST_270	p- protein	2.12436	1.66526e-189	Down-regulated
AST_5245	sucrose transporter	2.11996	7.12259e-09	Down-regulated
AST_7200	glycerol-3-phosphate acyltransferase	2.11996	4.21855e-07	Down-regulated
AST_13271	---NA---	2.11996	5.71325e-11	Down-regulated
AST_17493	ring finger protein 126	2.11996	1.0314e-43	Down-regulated
AST_11131	---NA---	2.11996	2.31932e-12	Down-regulated
AST_4475	triose phosphate phosphate translocator	2.11272	0	Down-regulated
AST_13581	at1g27340	2.10991	2.14324e-30	Down-regulated
AST_12112	shoot1 protein	2.10899	4.44747e-76	Down-regulated
AST_6516	gamma-tocopherol methyltransferase	2.10485	1.37572e-31	Down-regulated
AST_12732	protein	2.10268	1.43557e-17	Down-regulated
AST_907	wound responsive protein	2.10002	7.44137e-97	Down-regulated
AST_16026	---NA---	2.09941	0	Down-regulated
AST_12053	---NA---	2.08959	1.354e-89	Down-regulated
AST_14999	white-brown-complex abc transporter family	2.08519	3.13875e-19	Down-regulated
AST_14617	copper amine oxidase	2.08248	1.62258e-33	Down-regulated
AST_7477	translation initiation factor if-3	2.07932	9.70481e-07	Down-regulated
AST_13847	cytochrome p450	2.07296	8.69947e-32	Down-regulated
AST_20211	---NA---	2.06749	3.77047e-57	Down-regulated
AST_7167	---NA---	2.06749	2.92919e-27	Down-regulated
AST_1049	protein	2.06652	1.53521e-68	Down-regulated
AST_18850	---NA---	2.06392	1.88631e-123	Down-regulated
AST_8267	---NA---	2.05856	8.50785e-09	Down-regulated
AST_12569	30s ribosomal protein s13	2.05856	1.12882e-257	Down-regulated
AST_3290	leucine-rich repeat transmembrane protein kinase	2.05856	7.34961e-08	Down-regulated
AST_6543	staphylococcal nucleaseue family expressed	2.05856	3.32044e-08	Down-regulated
AST_3496	---NA---	2.04401	1.79116e-22	Down-regulated
AST_8423	leucine-rich repeat protein	2.04314	5.72209e-84	Down-regulated
AST_1069	rubisco subunit binding-protein alpha subunit	2.02685	4.9702e-06	Down-regulated
AST_17552	---NA---	2.02471	2.66633e-88	Down-regulated
AST_8228	solanesyl diphosphate synthase 2	2.0192	6.90276e-113	Down-regulated
AST_19608	---NA---	2.01568	0	Down-regulated
AST_16285	---NA---	2.01304	3.45604e-19	Down-regulated
AST_5427	ferredoxin-nadp oxidoreductase	2.00748	9.38642e-18	Down-regulated
AST_529	malate dehydrogenase	2.00329	6.1529e-42	Down-regulated
AST_683	glyoxalase bleomycin resistance protein dioxygenase	2.00266	0	Down-regulated
AST_4650	---NA---	2.0026	7.2583e-27	Down-regulated
